# Supplementary material for: A Comprehensive Analysis of Replicating Merkel Cell Polyomavirus Genomes Delineates the Viral Transcription Program and Suggests a Role for mcv-miR-M1 in Episomal Persistence
Source: PLoS Pathog. 2015 Jul 28;11(7):e1004974. doi: 10.1371/journal.ppat.1004974 (PMC4517807; doi:10.1371/journal.ppat.1004974)
Supplement: S1 Dataset — The dataset provides miRNA-seq read coverage data across the forward and reverse strand of MCVSyn genomes from PFSK-1:MCVSyn, WaGa or MKL-1 cells. Small RNA libraries were prepared with NEBNext or Truseq kits as indicated. (XLSX) [file ppat.1004974.s011.xlsx]

## Sheet: Dataset_S1
		PFSK-1:MCVSyn				WaGa				MKL-1
		NEBNext		TruSeq		NEBNext		TruSeq		NEBNext		TruSeq
	nt. position	forward	reverse	forward	reverse	forward	reverse	forward	reverse	forward	reverse	forward	reverse
	1	0	1	0	18	0	0	0	0	0	0	0	0
	2	0	4	0	231	0	0	0	2	0	0	0	0
	3	0	7	0	361	0	0	0	2	0	0	0	0
	4	0	28	0	371	0	0	0	2	0	0	0	0
	5	0	28	0	371	0	0	0	2	0	0	0	0
	6	1	28	0	371	0	0	0	2	0	0	0	0
	7	1	28	1	371	0	0	0	2	0	0	0	0
	8	7	28	17	372	0	0	0	2	0	0	0	0
	9	48	28	88	372	0	0	0	2	0	0	0	0
	10	48	28	88	372	0	0	0	2	0	0	0	0
	11	48	28	88	372	0	0	0	2	0	0	0	0
	12	48	28	88	372	0	0	0	2	0	0	0	0
	13	49	28	88	372	0	0	0	2	0	0	0	0
	14	49	28	88	372	0	0	0	2	0	0	0	0
	15	49	28	88	372	0	0	0	2	0	0	0	0
	16	50	28	88	372	0	0	0	2	0	0	0	0
	17	50	28	88	372	0	0	0	2	0	0	0	0
	18	50	28	88	368	0	0	0	2	0	0	0	0
	19	50	28	88	368	0	0	0	2	0	0	0	0
	20	50	28	88	367	0	0	0	2	0	0	0	0
	21	50	28	88	360	0	0	0	2	0	0	0	0
	22	50	28	88	355	0	0	0	2	0	0	0	0
	23	50	28	88	353	0	0	0	2	1	0	0	0
	24	50	0	88	1	0	0	0	0	1	0	0	0
	25	50	0	88	1	0	0	0	0	1	0	0	0
	26	50	0	88	1	0	0	0	0	1	0	0	0
	27	47	0	88	1	0	0	0	0	1	0	0	0
	28	44	0	88	1	0	0	0	0	1	0	0	0
	29	26	0	49	1	0	0	0	0	1	0	0	0
	30	8	0	40	1	0	0	0	0	1	0	0	0
	31	2	0	9	1	0	0	0	0	1	0	0	0
	32	1	0	5	1	0	0	0	0	1	0	0	0
	33	1	0	5	1	0	0	0	0	1	0	0	0
	34	1	0	3	1	0	0	0	0	1	0	0	0
	35	3	0	3	1	0	0	0	0	1	0	0	0
	36	4	0	3	1	0	0	0	0	1	0	0	0
	37	4	0	3	1	0	0	0	0	1	0	0	0
	38	4	0	3	1	0	0	0	0	1	0	0	0
	39	4	1	3	2	0	0	0	0	1	0	0	0
	40	4	1	4	2	0	0	0	0	0	0	0	0
	41	4	1	4	3	0	0	0	0	1	0	0	0
	42	3	1	4	3	0	0	0	0	1	0	0	0
	43	3	1	4	3	0	0	0	0	1	0	0	0
	44	3	1	4	3	0	0	0	0	0	0	0	0
	45	3	1	4	3	0	0	0	0	0	0	0	0
	46	3	1	4	3	0	0	0	0	0	0	0	0
	47	3	1	3	3	0	0	0	0	0	0	0	0
	48	3	1	3	3	0	0	0	0	0	0	0	0
	49	3	1	3	3	0	0	0	0	0	0	0	0
	50	2	1	3	3	0	0	0	0	0	0	0	0
	51	2	1	3	3	0	0	0	0	0	0	0	0
	52	1	1	3	3	0	0	0	0	0	0	0	0
	53	1	1	3	3	0	0	0	0	0	0	0	0
	54	0	1	3	3	0	0	0	0	0	0	0	0
	55	0	1	3	3	0	0	0	0	0	0	0	0
	56	0	1	3	3	0	0	0	0	0	0	0	0
	57	0	1	4	3	0	0	0	0	0	0	0	0
	58	0	1	4	3	0	0	0	0	0	0	0	0
	59	0	1	3	2	0	0	0	0	0	0	0	0
	60	0	1	3	2	0	0	0	0	0	0	0	0
	61	0	1	3	2	0	0	0	0	0	0	0	0
	62	0	0	4	2	0	0	0	0	0	0	0	0
	63	0	0	4	2	0	0	0	0	0	0	0	0
	64	0	0	4	2	0	0	0	0	0	0	0	0
	65	0	0	5	2	0	0	0	0	0	0	0	0
	66	0	0	5	2	0	0	0	0	0	0	0	0
	67	0	0	5	2	0	0	0	0	0	0	0	0
	68	0	0	5	2	0	0	0	0	0	0	0	0
	69	0	0	5	2	0	0	0	0	0	0	0	0
	70	0	0	5	2	0	0	0	0	0	0	0	0
	71	0	0	5	2	0	0	0	0	0	0	0	0
	72	0	0	5	2	0	0	0	0	0	0	0	0
	73	0	0	5	2	0	0	0	0	0	0	0	0
	74	0	0	5	2	0	0	0	0	0	0	0	0
	75	0	1	5	2	0	0	0	0	0	0	0	0
	76	0	1	5	2	0	0	0	0	0	0	0	0
	77	0	1	5	2	0	0	0	0	0	0	0	0
	78	0	1	5	2	0	0	0	0	0	0	0	0
	79	0	1	5	2	0	0	0	0	0	0	0	0
	80	0	1	5	2	0	0	0	0	0	0	0	0
	81	0	1	5	2	0	0	0	0	0	0	0	0
	82	0	1	5	2	0	0	0	0	0	0	0	0
	83	0	1	5	2	0	0	0	0	0	0	0	0
	84	0	1	5	2	0	0	0	0	0	0	0	0
	85	0	1	5	2	0	0	0	0	0	0	0	0
	86	0	1	5	2	0	0	0	0	0	0	0	0
	87	0	1	5	1	0	0	0	0	0	0	0	0
	88	0	1	5	2	0	0	0	0	0	0	0	0
	89	0	1	5	2	0	0	0	0	0	0	0	0
	90	0	1	5	2	0	0	0	0	0	0	0	0
	91	0	1	4	2	0	0	0	0	0	0	0	0
	92	0	1	5	1	0	0	0	0	0	0	0	0
	93	0	1	5	1	0	0	0	0	0	0	0	0
	94	0	1	6	1	0	0	0	0	0	0	0	0
	95	0	1	6	1	0	0	0	0	0	0	0	0
	96	0	1	6	1	0	0	0	0	0	0	0	0
	97	0	1	6	1	0	0	0	0	0	0	0	0
	98	1	1	6	1	0	0	0	0	0	0	0	0
	99	1	1	6	2	0	0	0	0	0	0	0	0
	100	1	1	6	2	0	0	0	0	0	0	0	0
	101	1	0	6	2	0	0	0	0	0	0	0	0
	102	3	0	6	2	0	0	0	0	0	0	0	0
	103	3	0	6	2	0	0	0	0	0	0	0	0
	104	3	0	6	2	0	0	0	0	0	0	0	0
	105	3	0	6	2	0	0	0	0	0	0	0	0
	106	3	0	6	2	0	0	0	0	0	0	0	0
	107	3	0	7	2	0	0	0	0	0	0	0	0
	108	3	0	6	2	0	0	0	0	0	0	0	0
	109	3	0	5	2	0	0	0	0	0	0	0	0
	110	3	0	5	2	0	0	0	0	0	0	0	0
	111	3	0	5	2	0	0	0	0	0	0	0	0
	112	3	0	5	2	0	0	0	0	0	0	0	0
	113	3	0	4	2	0	0	0	0	0	0	0	0
	114	3	0	4	2	0	0	0	0	0	0	0	0
	115	3	0	5	2	0	0	0	0	0	0	0	0
	116	2	0	4	2	0	0	0	0	0	0	0	0
	117	2	0	4	2	0	0	0	0	0	0	0	0
	118	0	0	4	2	0	0	0	0	0	0	0	0
	119	0	0	4	2	0	0	0	0	0	0	0	0
	120	0	0	4	2	0	0	0	0	0	0	0	0
	121	0	0	4	2	0	0	0	0	0	0	0	0
	122	0	0	4	3	0	0	0	0	0	0	0	0
	123	0	0	4	3	0	0	0	0	0	0	0	0
	124	0	1	4	3	0	0	0	0	0	0	0	0
	125	0	1	4	3	0	0	0	0	0	0	0	0
	126	0	1	4	3	0	0	0	0	0	0	0	0
	127	0	1	4	3	0	0	0	0	0	0	0	0
	128	0	1	4	3	0	0	0	0	0	0	0	0
	129	0	1	4	3	0	0	0	0	0	0	0	0
	130	0	1	4	4	0	0	0	0	0	0	0	0
	131	1	1	4	4	0	0	0	0	0	0	0	0
	132	1	1	4	4	0	0	0	0	0	0	0	0
	133	1	1	4	4	0	0	0	0	0	0	0	0
	134	1	1	4	4	0	0	0	0	0	0	0	0
	135	1	1	4	4	0	0	0	0	0	0	0	0
	136	1	1	4	4	0	0	0	0	0	0	0	0
	137	1	1	4	4	0	0	0	0	0	0	0	0
	138	1	1	4	4	0	0	0	0	0	0	0	0
	139	1	1	4	3	0	0	0	0	0	0	0	0
	140	1	1	4	3	0	0	0	0	0	0	0	0
	141	1	1	4	3	0	0	0	0	0	0	0	0
	142	1	1	4	3	0	0	0	0	0	0	0	0
	143	1	1	3	3	0	0	0	0	0	0	0	0
	144	1	2	3	3	0	0	0	0	0	0	0	0
	145	1	3	2	3	0	0	0	0	0	0	0	0
	146	2	3	2	10	0	0	0	0	0	0	0	0
	147	2	3	2	10	0	0	0	0	0	0	0	0
	148	2	3	2	10	0	0	0	0	1	0	0	0
	149	4	3	3	10	0	0	0	0	1	0	0	0
	150	5	3	5	9	0	0	0	0	1	0	0	0
	151	5	3	5	9	0	0	0	0	2	0	0	0
	152	5	3	5	9	0	0	0	0	4	0	0	0
	153	5	3	5	9	0	0	0	0	5	0	0	0
	154	5	3	5	9	0	0	0	0	5	0	0	0
	155	5	3	5	9	0	0	0	0	5	0	0	0
	156	5	3	5	9	0	0	0	0	5	0	0	0
	157	5	3	6	9	0	0	1	0	5	0	0	0
	158	5	3	6	9	0	0	1	0	5	0	0	0
	159	5	3	13	9	0	0	2	0	5	0	0	0
	160	5	3	13	9	0	0	2	0	5	0	0	0
	161	5	2	13	9	0	0	3	0	5	0	0	0
	162	6	2	19	8	0	0	10	0	5	0	0	0
	163	7	2	21	8	0	0	10	0	5	0	0	0
	164	7	2	27	8	0	0	10	0	5	0	0	0
	165	6	2	28	8	0	0	11	0	5	0	0	0
	166	6	2	31	8	0	0	18	0	5	0	0	0
	167	6	1	31	8	0	0	18	0	5	0	0	0
	168	6	0	31	8	0	0	18	0	5	0	0	0
	169	6	1	31	8	0	0	18	0	4	0	0	0
	170	4	1	31	8	0	0	18	0	3	0	0	0
	171	4	1	31	8	0	0	18	0	1	0	0	0
	172	3	0	30	1	0	0	18	0	3	0	0	0
	173	4	0	30	0	0	0	18	0	3	0	0	0
	174	4	0	36	0	0	0	18	0	3	0	0	0
	175	3	0	36	0	0	0	18	0	1	0	3	0
	176	3	0	37	0	0	0	18	0	1	0	3	0
	177	3	0	37	0	0	0	18	0	1	0	3	0
	178	3	0	37	0	0	0	18	0	1	0	3	0
	179	3	0	35	0	0	0	18	0	1	0	3	0
	180	3	0	26	0	0	0	8	0	0	0	3	0
	181	6	0	24	0	0	0	8	0	0	0	3	0
	182	7	1	24	0	0	0	9	0	0	0	3	0
	183	8	1	24	0	0	0	9	0	0	0	3	0
	184	8	1	14	0	0	0	1	0	0	0	3	0
	185	8	1	11	0	0	0	1	0	0	0	3	0
	186	8	1	11	0	0	0	1	0	0	0	3	0
	187	9	1	16	0	0	0	1	0	0	0	3	0
	188	9	1	16	0	0	0	1	0	0	0	3	0
	189	9	1	17	1	0	0	1	0	0	0	3	0
	190	9	1	17	1	0	0	1	0	0	0	3	0
	191	8	1	16	1	0	0	1	0	0	0	3	0
	192	8	1	16	1	0	0	1	0	0	0	3	0
	193	8	1	11	1	0	0	1	0	0	0	3	0
	194	9	2	12	1	0	0	1	0	0	0	3	0
	195	9	2	12	1	0	0	1	0	0	0	3	0
	196	9	2	12	1	0	0	1	0	0	0	3	0
	197	9	2	12	1	0	0	1	0	0	0	3	0
	198	9	2	12	1	0	0	1	0	0	0	3	0
	199	6	2	12	1	0	0	1	0	0	0	0	0
	200	6	2	12	1	1	0	1	0	0	0	0	0
	201	5	2	12	1	1	0	1	0	0	0	0	0
	202	4	2	12	1	1	0	0	0	0	0	0	0
	203	4	2	12	1	1	0	0	0	0	0	0	0
	204	5	2	12	1	1	0	0	0	0	0	0	0
	205	5	2	7	1	1	0	0	0	0	0	0	0
	206	3	2	7	1	1	0	0	0	0	0	0	0
	207	3	2	6	1	1	0	0	0	0	0	0	0
	208	3	2	10	1	2	0	0	0	0	0	0	0
	209	3	2	9	1	3	0	0	0	0	0	0	0
	210	3	2	8	1	4	0	0	0	0	0	0	0
	211	3	1	8	1	5	0	0	0	0	0	0	0
	212	3	1	8	1	5	0	0	0	0	0	0	0
	213	3	1	8	1	5	0	0	0	0	0	0	0
	214	3	1	8	1	10	0	0	0	0	0	0	0
	215	3	1	9	1	10	0	0	0	0	0	0	0
	216	5	1	9	1	10	0	0	0	0	0	0	0
	217	4	1	9	1	10	0	0	0	0	0	0	0
	218	3	1	9	1	10	0	0	0	0	0	0	0
	219	3	1	10	1	10	0	0	0	0	0	0	0
	220	3	0	10	1	10	0	0	0	0	0	0	0
	221	4	0	11	1	10	0	0	0	0	0	0	0
	222	6	0	11	1	10	0	0	0	0	0	0	0
	223	6	0	11	1	10	0	0	0	0	0	0	0
	224	6	0	11	1	10	0	0	0	0	0	0	0
	225	6	0	10	1	10	0	0	0	0	0	0	0
	226	6	0	10	1	10	0	0	0	0	0	0	0
	227	7	0	9	1	10	0	0	0	0	0	0	0
	228	7	0	9	2	10	0	0	0	0	0	0	0
	229	7	0	9	2	10	0	0	0	0	0	0	0
	230	7	0	9	2	10	0	0	0	0	0	0	0
	231	7	0	9	2	9	0	0	0	0	0	0	0
	232	7	0	8	2	8	0	0	0	0	0	0	0
	233	7	0	6	2	7	0	0	0	0	0	0	0
	234	7	0	6	2	5	0	0	0	0	0	0	0
	235	7	0	5	2	5	0	0	0	0	0	0	0
	236	7	0	5	2	5	0	0	0	0	0	0	0
	237	6	0	5	2	5	0	0	0	0	0	0	0
	238	6	0	5	2	5	0	0	0	0	0	0	0
	239	3	0	5	2	5	0	0	0	1	0	0	0
	240	3	0	5	1	5	0	0	0	1	0	0	0
	241	1	0	5	1	4	0	0	0	1	0	0	0
	242	0	0	4	1	2	0	0	0	1	0	0	0
	243	0	0	5	1	0	0	0	0	1	0	0	0
	244	0	0	5	1	0	0	0	0	2	0	0	0
	245	0	0	5	1	0	0	0	0	2	0	0	0
	246	0	0	5	1	0	0	0	0	2	0	0	0
	247	0	0	6	1	0	0	0	0	2	0	0	0
	248	0	0	6	1	0	0	0	0	2	0	0	0
	249	0	0	6	1	0	0	0	0	2	0	0	0
	250	0	0	6	1	0	0	0	0	2	0	0	0
	251	0	0	10	1	0	0	0	0	2	0	0	0
	252	0	0	10	1	0	0	0	0	2	0	0	0
	253	0	0	10	1	0	0	0	0	2	0	0	0
	254	0	0	14	1	0	0	0	0	2	0	0	0
	255	0	0	14	1	0	0	0	0	2	0	0	0
	256	0	0	14	1	0	0	0	0	2	0	0	0
	257	0	0	14	2	0	0	0	0	1	0	0	0
	258	0	0	14	2	0	0	0	0	1	0	0	0
	259	0	0	14	2	0	0	0	0	1	0	0	0
	260	0	0	15	2	0	0	0	0	1	0	0	0
	261	0	0	15	2	0	0	0	0	1	0	0	0
	262	0	0	15	2	0	0	0	0	1	0	0	0
	263	0	0	15	2	0	0	0	0	0	0	0	0
	264	1	0	15	2	0	0	0	0	0	0	0	0
	265	1	0	15	2	0	0	0	0	0	0	0	0
	266	3	0	14	2	0	0	0	0	0	0	0	0
	267	4	0	14	2	0	0	0	0	0	0	0	0
	268	4	0	14	2	0	0	0	0	0	0	0	0
	269	4	0	14	2	0	0	0	0	0	0	0	0
	270	4	0	13	2	0	0	0	0	0	0	0	0
	271	4	0	13	2	0	0	0	0	0	0	0	0
	272	4	0	8	2	0	0	0	0	0	0	0	0
	273	4	0	8	2	0	0	0	0	0	0	0	0
	274	4	0	8	2	0	0	0	0	0	0	0	0
	275	5	0	8	2	0	0	0	0	1	0	0	0
	276	5	0	8	2	0	0	0	0	1	0	0	0
	277	5	0	8	2	0	0	0	0	2	0	0	0
	278	5	0	8	2	0	0	0	0	2	0	0	0
	279	5	0	8	1	0	0	0	0	2	0	0	0
	280	5	0	8	1	0	0	0	0	2	0	0	0
	281	5	0	8	1	0	0	0	0	2	0	0	0
	282	5	0	8	1	0	0	0	0	2	0	0	0
	283	4	0	8	1	0	0	0	0	2	0	0	0
	284	4	0	5	1	0	0	0	0	2	0	0	0
	285	4	0	4	1	0	0	0	0	2	0	0	0
	286	3	0	4	1	0	0	0	0	2	0	0	0
	287	3	0	4	1	0	0	0	0	2	0	0	0
	288	2	0	4	1	0	0	0	0	2	0	0	0
	289	2	0	4	2	0	0	0	0	2	0	0	0
	290	0	0	4	2	0	0	0	0	2	0	0	0
	291	0	0	4	2	0	0	0	0	2	0	0	0
	292	0	0	4	2	0	0	0	0	2	0	0	0
	293	0	0	4	2	0	0	0	0	2	0	0	0
	294	0	0	3	2	0	0	0	0	2	0	0	0
	295	0	0	3	2	0	0	0	0	1	0	0	0
	296	0	0	3	2	0	0	0	0	1	0	0	0
	297	0	0	2	2	0	0	0	0	1	0	0	0
	298	0	0	2	2	0	0	0	0	1	0	0	0
	299	0	0	2	2	0	0	0	0	1	0	0	0
	300	0	0	2	2	0	0	0	0	1	0	0	0
	301	0	0	2	2	0	0	0	0	1	0	0	0
	302	0	0	2	2	0	0	0	0	1	0	0	0
	303	0	0	2	2	0	0	0	0	1	0	0	0
	304	0	0	2	2	0	0	0	0	1	0	0	0
	305	0	0	1	3	0	0	0	0	1	0	0	0
	306	0	0	1	3	0	0	0	0	1	0	0	0
	307	0	0	1	3	0	0	0	0	1	0	0	0
	308	1	0	1	2	0	0	0	0	1	0	0	0
	309	1	0	1	2	0	0	0	0	1	0	0	0
	310	1	0	1	2	0	0	0	0	1	0	0	0
	311	1	0	0	2	0	0	0	0	0	0	0	0
	312	1	0	0	2	0	0	0	0	0	0	0	0
	313	1	0	0	2	0	0	0	0	0	0	0	0
	314	1	0	0	3	0	0	0	0	0	0	0	0
	315	1	0	0	3	0	0	0	0	0	0	0	0
	316	1	0	0	3	0	0	0	0	0	0	0	0
	317	1	0	0	3	0	0	0	0	0	0	0	0
	318	1	0	0	3	0	0	0	0	0	0	0	0
	319	1	0	0	4	0	0	0	0	0	0	0	0
	320	1	0	0	4	0	0	0	0	0	0	0	0
	321	1	0	0	4	0	0	0	0	0	0	0	0
	322	1	0	0	4	0	0	0	0	0	0	0	0
	323	1	0	0	4	0	0	0	0	0	0	0	0
	324	1	0	0	4	0	0	0	0	0	0	0	0
	325	1	0	0	4	0	0	0	0	0	0	0	0
	326	1	0	0	4	0	0	0	0	0	0	0	0
	327	1	0	0	4	0	0	0	0	0	0	0	0
	328	0	0	0	4	0	0	0	0	0	0	0	0
	329	0	0	0	4	0	0	0	0	0	0	0	0
	330	0	0	0	5	0	0	0	0	0	0	0	0
	331	0	0	0	5	0	0	0	0	0	0	0	0
	332	0	0	0	5	0	0	0	0	0	0	0	0
	333	0	0	0	5	0	0	0	0	0	0	0	0
	334	0	0	0	6	0	0	0	0	0	0	0	0
	335	0	0	0	6	0	0	0	0	0	0	0	0
	336	0	0	0	6	0	0	0	0	0	0	0	0
	337	0	0	0	7	0	0	0	0	0	0	0	0
	338	0	0	0	7	0	0	0	0	0	0	0	0
	339	0	0	0	7	0	0	0	0	0	0	0	0
	340	2	0	0	6	0	0	0	0	3	0	0	0
	341	2	0	0	6	0	0	0	0	3	0	0	0
	342	3	0	0	6	0	0	0	0	3	0	0	0
	343	3	0	0	6	0	0	0	0	3	0	0	0
	344	3	0	0	6	0	0	0	0	3	0	0	0
	345	3	0	0	6	0	0	0	0	3	0	0	0
	346	3	0	0	6	3	0	0	0	3	0	0	0
	347	3	0	0	6	3	0	0	0	3	0	0	0
	348	3	0	0	6	3	0	0	0	3	0	0	0
	349	4	0	0	6	3	0	2	0	3	0	0	0
	350	4	0	0	7	3	0	2	0	3	0	0	0
	351	4	0	0	7	3	0	2	0	3	0	0	0
	352	4	0	0	7	10	0	2	0	5	0	0	0
	353	4	0	0	7	10	0	2	0	6	0	0	0
	354	4	0	0	7	10	0	2	0	6	0	0	0
	355	4	0	0	7	10	0	2	0	6	0	0	0
	356	4	0	0	6	10	0	2	0	6	0	0	0
	357	4	0	0	6	10	0	2	0	9	0	0	0
	358	4	0	0	6	10	0	2	0	9	0	0	0
	359	4	0	0	6	10	0	2	0	9	0	0	0
	360	4	0	0	6	10	0	2	0	6	0	0	0
	361	4	0	0	6	10	0	2	0	6	0	0	0
	362	4	0	0	6	10	0	2	0	6	0	0	0
	363	4	0	0	6	10	0	2	0	6	0	0	0
	364	2	0	0	6	9	0	2	0	6	0	0	0
	365	2	0	0	5	9	0	2	0	6	0	0	0
	366	2	0	0	5	9	0	2	0	6	0	0	0
	367	2	0	0	5	8	0	2	0	6	0	0	0
	368	2	0	0	5	7	0	2	0	6	0	0	0
	369	1	0	0	5	7	0	0	0	6	0	0	0
	370	1	0	0	4	7	0	0	0	6	0	0	0
	371	1	0	0	4	6	0	0	0	6	0	0	0
	372	1	2	0	4	6	0	0	0	6	0	0	0
	373	1	2	0	4	6	0	0	0	6	0	0	0
	374	1	2	0	4	6	0	0	0	5	0	0	0
	375	0	2	0	4	6	0	0	0	5	0	0	0
	376	0	2	0	4	2	0	0	0	3	0	0	0
	377	0	2	0	4	1	0	0	0	3	0	0	0
	378	0	2	0	4	1	0	0	0	3	0	0	0
	379	0	2	0	4	1	0	0	0	3	0	0	0
	380	0	2	0	4	0	0	0	0	3	0	0	0
	381	0	2	0	3	0	0	0	0	3	0	0	0
	382	0	2	0	5	0	0	0	0	3	0	0	0
	383	0	2	0	5	0	0	0	0	3	0	0	0
	384	0	2	0	9	0	0	0	0	3	0	0	0
	385	0	2	0	8	0	0	0	0	0	0	0	0
	386	0	2	0	8	0	0	0	0	0	0	0	0
	387	1	2	0	8	0	0	0	0	0	0	0	0
	388	1	2	0	7	0	0	0	0	0	0	0	0
	389	1	2	0	7	0	0	0	0	0	0	0	0
	390	1	2	0	7	0	0	0	0	0	0	0	0
	391	2	2	0	7	0	0	0	0	0	0	0	0
	392	2	2	0	7	0	0	0	0	0	0	0	0
	393	2	0	1	7	0	0	0	0	0	0	0	0
	394	2	0	1	7	0	0	0	0	0	0	0	0
	395	2	0	1	7	0	0	0	0	0	0	0	0
	396	2	0	1	7	0	0	0	0	0	0	0	0
	397	2	0	1	7	0	0	0	0	0	0	0	0
	398	2	3	1	7	0	0	0	0	0	0	0	0
	399	2	3	1	7	0	0	0	0	0	0	0	0
	400	3	3	2	7	0	0	0	0	0	0	0	0
	401	3	3	2	6	0	0	0	0	0	0	0	0
	402	6	3	2	6	0	0	0	0	0	0	0	0
	403	6	3	2	6	1	0	0	0	0	0	0	0
	404	6	3	2	6	1	0	0	0	0	0	0	0
	405	6	3	2	6	1	0	0	0	0	0	0	0
	406	7	3	2	5	1	0	0	0	0	0	0	0
	407	7	3	2	6	1	0	0	0	0	0	0	0
	408	7	3	2	3	1	0	0	0	0	0	0	0
	409	6	3	2	3	1	0	0	0	0	0	0	0
	410	6	3	2	1	1	0	0	0	0	0	0	0
	411	6	3	2	1	1	0	0	0	0	0	0	0
	412	6	3	6	1	1	0	0	0	0	0	0	0
	413	6	3	7	1	1	0	0	0	0	0	0	0
	414	6	3	7	1	1	0	0	0	0	0	0	0
	415	6	3	6	1	1	0	0	0	0	0	0	0
	416	6	3	6	1	1	0	0	0	0	0	0	0
	417	6	3	6	1	1	0	0	0	0	0	0	0
	418	6	3	6	1	2	0	0	0	0	0	0	0
	419	6	3	6	1	2	0	0	0	0	0	0	0
	420	6	3	6	1	2	0	0	0	0	0	0	0
	421	4	3	6	1	2	0	0	0	0	0	0	0
	422	4	3	6	1	2	0	0	0	0	0	0	0
	423	4	3	6	1	2	0	0	0	0	0	0	0
	424	4	4	6	1	2	0	0	0	0	0	0	0
	425	4	4	6	1	2	0	0	0	0	0	0	0
	426	4	4	6	1	2	0	0	0	0	0	0	0
	427	4	4	6	1	2	0	0	0	0	0	0	0
	428	3	4	6	1	2	0	0	0	0	0	0	0
	429	2	1	6	1	2	0	0	0	0	0	0	0
	430	0	1	2	1	1	0	0	0	0	0	0	0
	431	0	3	2	1	1	0	0	0	0	0	0	0
	432	0	3	2	2	1	0	0	0	0	0	0	0
	433	0	3	2	2	0	0	0	0	0	0	0	0
	434	0	3	3	2	0	0	0	0	0	0	0	0
	435	0	3	3	2	0	0	0	0	0	0	0	0
	436	0	3	3	2	0	0	0	0	0	0	0	0
	437	0	3	3	2	0	0	0	0	0	0	0	0
	438	0	3	3	2	0	0	0	0	0	0	0	0
	439	0	3	3	2	0	0	0	0	0	0	0	0
	440	0	3	3	2	0	0	0	0	0	0	0	0
	441	0	3	3	2	0	0	0	0	0	0	0	0
	442	0	3	3	2	0	0	0	0	0	0	0	0
	443	0	3	3	2	0	0	0	0	0	0	0	0
	444	0	3	2	2	0	0	0	0	0	0	0	0
	445	0	3	2	2	0	0	0	0	0	0	0	0
	446	0	3	2	2	0	0	0	0	0	0	0	0
	447	0	3	2	2	0	0	0	0	0	0	0	0
	448	0	3	2	2	0	0	0	0	0	0	0	0
	449	0	3	2	2	0	0	0	0	0	0	0	0
	450	0	3	2	2	0	0	0	0	0	0	0	0
	451	0	3	2	2	0	0	0	0	0	0	0	0
	452	2	3	2	2	1	0	0	0	0	0	0	0
	453	2	3	2	2	1	0	0	0	0	0	0	0
	454	2	1	2	2	1	0	0	0	0	0	0	0
	455	2	1	2	2	1	0	0	0	0	0	0	0
	456	4	1	2	2	1	0	0	0	0	0	0	0
	457	4	0	2	2	1	0	0	0	0	0	0	0
	458	5	0	2	2	3	0	0	0	0	0	0	0
	459	5	0	2	2	3	0	0	0	0	0	0	0
	460	7	0	2	2	3	0	0	0	0	0	0	0
	461	7	0	2	2	3	0	0	0	0	0	0	0
	462	7	0	2	2	3	0	0	0	0	0	0	0
	463	7	0	2	2	3	0	0	0	0	0	0	0
	464	7	0	2	1	3	0	0	0	0	0	0	0
	465	7	0	2	1	3	0	0	0	0	0	0	0
	466	7	0	2	1	3	0	0	0	0	0	0	0
	467	7	0	2	1	3	0	0	0	0	0	0	0
	468	7	0	2	1	3	0	0	0	0	0	0	0
	469	8	0	2	1	3	0	0	0	0	0	0	0
	470	8	0	2	2	3	0	0	0	0	0	0	0
	471	8	0	2	2	3	0	0	0	0	0	0	0
	472	8	0	2	2	3	0	0	0	0	0	0	0
	473	8	0	2	2	3	0	0	0	0	0	0	0
	474	8	0	2	2	3	0	0	0	0	0	0	0
	475	8	0	2	2	3	0	0	0	0	0	0	0
	476	8	0	2	2	1	0	0	0	0	0	0	0
	477	6	0	2	2	0	0	0	0	0	0	0	0
	478	4	0	2	2	0	0	0	0	0	0	0	0
	479	3	0	1	2	0	0	0	0	0	0	0	0
	480	2	0	1	2	0	0	0	0	0	0	0	0
	481	1	0	1	2	0	0	0	0	0	0	0	0
	482	1	0	1	2	0	0	0	0	0	0	0	0
	483	1	0	1	2	0	0	0	0	0	0	0	0
	484	1	0	1	2	0	0	0	0	0	0	0	0
	485	1	0	0	2	0	0	0	0	0	0	0	0
	486	2	0	0	2	0	0	0	0	0	0	0	0
	487	2	0	0	2	0	0	0	0	0	0	0	0
	488	2	0	0	2	0	0	0	0	0	0	0	0
	489	2	0	0	2	0	0	0	0	0	0	0	0
	490	2	0	0	2	0	0	0	0	0	0	0	0
	491	2	0	0	2	0	0	0	0	0	0	0	0
	492	1	0	0	2	0	0	0	0	0	0	0	0
	493	1	0	0	3	0	0	0	0	0	0	0	0
	494	1	0	5	3	0	0	0	0	0	0	0	0
	495	1	0	5	3	0	0	0	0	0	0	0	0
	496	1	0	5	3	0	0	0	0	0	0	0	0
	497	1	0	5	3	0	0	0	0	0	0	0	0
	498	1	0	5	3	0	0	0	0	0	0	0	0
	499	1	0	7	3	0	0	0	0	0	0	0	0
	500	1	0	7	3	0	0	0	0	0	0	0	0
	501	1	0	7	3	0	0	0	0	0	0	0	0
	502	1	0	7	3	0	0	0	0	0	0	0	0
	503	1	0	7	3	0	0	0	0	0	0	0	0
	504	0	0	7	3	0	0	0	0	0	0	0	0
	505	0	1	7	3	0	0	0	0	0	0	0	0
	506	0	1	7	3	0	0	0	0	0	0	0	0
	507	0	1	7	3	0	0	0	0	0	0	0	0
	508	0	1	7	3	0	0	0	0	0	0	0	0
	509	0	1	7	2	0	0	0	0	0	0	0	0
	510	0	1	7	2	0	0	0	0	0	0	0	0
	511	0	4	7	2	0	0	0	0	0	0	0	0
	512	0	4	7	2	0	0	0	0	0	0	0	0
	513	0	4	7	2	0	0	0	0	0	0	0	0
	514	0	4	8	2	0	0	0	0	0	0	0	0
	515	0	4	8	2	0	0	0	0	0	0	0	0
	516	0	4	8	2	0	0	0	0	0	0	0	0
	517	0	4	8	2	0	0	0	0	0	0	0	0
	518	0	4	6	3	0	0	0	0	0	0	0	0
	519	0	4	6	3	0	0	0	0	0	0	0	0
	520	0	4	6	3	0	0	0	0	0	0	0	0
	521	0	4	6	2	0	0	0	0	0	0	0	0
	522	0	4	6	2	0	0	0	0	0	0	0	0
	523	0	4	6	2	0	0	0	0	0	0	0	0
	524	0	3	6	2	0	0	0	0	0	0	0	0
	525	0	3	6	2	0	0	0	0	0	0	0	0
	526	0	3	1	2	0	0	0	0	0	0	0	0
	527	0	3	1	2	0	0	0	0	0	0	0	0
	528	0	3	1	2	0	0	0	0	0	0	0	0
	529	0	3	1	2	0	0	0	0	0	0	0	0
	530	0	3	1	2	0	0	0	0	0	0	0	0
	531	0	3	1	2	0	0	0	0	0	0	0	0
	532	0	3	1	2	0	0	0	0	0	0	0	0
	533	0	3	1	2	0	0	0	0	0	0	0	0
	534	0	3	1	2	0	0	0	0	0	0	0	0
	535	0	3	1	2	0	0	0	0	0	0	0	0
	536	0	3	1	4	0	0	0	0	0	0	0	0
	537	0	3	1	4	0	0	0	0	0	0	0	0
	538	0	0	1	4	0	0	0	0	0	0	0	0
	539	0	0	1	4	0	0	0	0	0	0	0	0
	540	0	0	1	5	0	0	0	0	0	0	0	0
	541	0	0	1	5	0	0	0	0	0	0	0	0
	542	1	0	1	5	0	0	0	0	0	0	0	0
	543	1	0	1	4	0	0	0	0	0	0	0	0
	544	1	0	1	4	0	0	0	0	0	0	0	0
	545	1	0	1	4	0	0	0	0	0	0	0	0
	546	1	0	1	4	0	0	0	0	0	0	0	0
	547	1	0	1	4	0	0	0	0	0	0	0	0
	548	1	0	1	4	0	0	0	0	0	0	0	0
	549	1	0	1	4	0	0	0	0	0	0	0	0
	550	1	0	1	4	0	0	0	0	0	0	0	0
	551	1	0	1	4	0	0	0	0	0	0	0	0
	552	1	0	1	4	0	0	0	0	0	0	0	0
	553	1	0	1	4	0	0	0	0	0	0	0	0
	554	1	0	1	4	0	0	0	0	0	0	0	0
	555	1	0	2	4	0	0	0	0	0	0	0	0
	556	1	0	2	4	0	0	0	0	0	0	0	0
	557	1	0	3	5	0	0	0	0	0	0	0	0
	558	1	0	3	3	0	0	0	0	0	0	0	0
	559	1	0	3	3	0	0	0	0	0	0	0	0
	560	1	0	3	3	0	0	0	0	0	0	0	0
	561	1	0	3	3	0	0	0	0	0	0	0	0
	562	1	0	3	3	0	0	0	0	0	0	0	0
	563	1	0	3	3	0	0	0	0	0	0	0	0
	564	1	0	3	3	0	0	0	0	0	0	0	0
	565	1	0	2	3	0	0	0	0	0	0	0	0
	566	1	0	2	3	0	0	0	0	0	0	0	0
	567	1	0	2	3	0	0	0	0	0	0	0	0
	568	1	0	2	3	0	0	0	0	0	0	0	0
	569	1	0	2	2	0	0	0	0	2	0	0	0
	570	2	0	2	2	0	0	0	0	2	0	0	0
	571	1	0	2	2	0	0	0	0	2	0	0	0
	572	1	0	2	2	0	0	0	0	2	0	0	0
	573	1	0	2	2	0	0	0	0	2	0	0	0
	574	1	0	2	2	0	0	0	0	2	0	0	0
	575	1	0	4	2	0	0	0	0	2	0	0	0
	576	1	0	4	2	0	0	0	0	2	0	0	0
	577	1	0	4	2	0	0	0	0	2	0	0	0
	578	1	0	4	2	0	0	0	0	2	0	0	0
	579	3	0	4	2	0	0	0	0	2	0	0	0
	580	3	0	4	2	0	0	0	0	2	0	0	0
	581	3	0	3	2	0	0	0	0	2	0	0	0
	582	3	0	3	2	0	0	0	0	2	0	0	0
	583	3	0	3	2	0	0	0	0	2	0	0	0
	584	3	0	3	2	1	0	0	0	2	0	0	0
	585	3	0	3	2	1	0	0	0	2	0	0	0
	586	3	0	3	2	1	0	0	0	2	0	0	0
	587	3	0	3	2	1	0	0	0	2	0	0	0
	588	3	0	3	2	1	0	0	0	2	0	0	0
	589	3	0	3	2	1	0	0	0	2	0	0	0
	590	3	0	3	2	1	0	0	0	2	0	0	0
	591	3	0	3	1	1	0	0	0	0	0	0	0
	592	3	0	3	1	1	0	0	0	0	0	0	0
	593	5	0	3	1	1	0	0	0	0	0	0	0
	594	5	0	3	1	1	0	0	0	0	0	0	0
	595	5	0	3	1	1	0	0	0	0	0	0	0
	596	5	0	3	1	1	0	0	0	0	0	0	0
	597	5	0	4	1	1	0	0	0	0	0	0	0
	598	4	0	4	1	1	0	0	0	0	0	0	0
	599	4	0	4	1	1	0	0	0	0	0	0	0
	600	4	0	4	1	0	0	0	0	0	0	0	0
	601	5	0	4	1	0	0	0	0	0	0	0	0
	602	5	0	5	1	0	0	0	0	0	0	0	0
	603	5	0	3	1	1	0	0	0	1	0	0	0
	604	7	0	3	1	1	0	0	0	1	0	0	0
	605	7	0	3	1	1	0	0	0	1	0	0	0
	606	8	0	2	1	1	0	0	0	1	0	0	0
	607	8	0	2	1	2	0	0	0	1	0	0	0
	608	10	0	2	0	3	0	0	0	1	0	0	0
	609	10	0	2	0	4	0	0	0	1	0	0	0
	610	10	0	2	0	4	0	0	0	1	0	0	0
	611	10	0	2	0	4	0	0	0	1	0	0	0
	612	10	0	2	0	5	0	0	0	1	0	0	0
	613	10	0	2	0	5	0	0	0	1	0	0	0
	614	12	0	2	0	5	0	0	0	1	0	0	0
	615	10	0	2	0	5	0	0	0	1	0	0	0
	616	10	0	3	0	5	0	0	0	2	0	0	0
	617	10	0	3	0	5	0	0	0	2	0	0	0
	618	11	0	7	0	5	0	0	0	2	0	0	0
	619	11	0	7	1	5	0	0	0	3	0	0	0
	620	11	0	7	1	5	0	0	0	3	0	0	0
	621	11	0	7	1	5	0	0	0	3	0	0	0
	622	11	0	7	2	5	0	0	0	3	0	0	0
	623	11	0	7	2	5	0	0	0	3	0	0	0
	624	11	0	7	2	5	0	0	0	3	0	0	0
	625	8	1	7	2	4	0	0	0	3	0	0	0
	626	7	1	7	4	4	0	0	0	3	0	0	0
	627	6	1	7	4	4	0	0	0	3	0	0	0
	628	6	1	7	4	3	0	0	0	3	0	0	0
	629	6	2	7	4	3	0	0	0	3	0	0	0
	630	6	2	7	4	2	0	0	0	3	0	0	0
	631	6	2	7	4	2	0	0	0	3	0	0	0
	632	6	2	7	4	1	0	0	0	3	0	0	0
	633	5	2	7	4	1	0	0	0	3	0	0	0
	634	4	2	7	4	1	0	0	0	2	0	0	0
	635	4	2	7	4	1	0	0	0	2	0	0	0
	636	1	2	7	4	1	0	0	0	0	0	0	0
	637	1	2	7	4	1	0	0	0	0	0	0	0
	638	1	2	7	4	1	0	0	0	0	0	0	0
	639	1	2	7	4	1	0	0	0	0	0	0	0
	640	1	2	7	4	1	0	0	0	0	0	0	0
	641	1	2	8	4	1	0	0	0	0	0	0	0
	642	1	1	8	4	1	0	0	0	0	0	0	0
	643	0	1	8	4	1	0	0	0	0	0	0	0
	644	1	1	8	4	0	0	0	0	0	0	0	0
	645	1	1	8	4	0	0	0	0	0	0	0	0
	646	1	1	8	4	0	0	0	0	0	0	0	0
	647	1	1	8	4	0	0	0	0	0	0	0	0
	648	1	1	7	4	0	0	0	0	0	0	0	0
	649	1	1	3	4	0	0	0	0	0	0	0	0
	650	1	1	3	4	0	0	0	0	0	0	0	0
	651	1	0	3	5	0	0	0	0	0	0	0	0
	652	1	0	4	5	0	0	0	0	0	0	0	0
	653	1	0	3	5	0	0	0	0	0	0	0	0
	654	1	0	4	5	0	0	0	0	0	0	0	0
	655	1	0	5	5	0	0	0	0	0	0	0	0
	656	1	0	5	5	0	0	0	0	0	0	0	0
	657	1	0	5	5	0	0	0	0	0	0	0	0
	658	1	0	5	4	0	0	0	0	0	0	0	0
	659	1	0	5	4	0	0	0	0	0	0	0	0
	660	1	0	5	5	0	0	0	0	0	0	0	0
	661	1	0	5	5	0	0	0	0	0	0	0	0
	662	1	0	5	5	0	0	0	0	0	0	0	0
	663	1	0	5	5	0	0	0	0	0	0	0	0
	664	1	0	5	5	0	0	0	0	0	0	0	0
	665	1	0	5	5	0	0	0	0	0	0	0	0
	666	1	0	5	5	0	0	0	0	0	0	0	0
	667	1	0	5	5	0	0	0	0	0	0	0	0
	668	1	0	5	5	0	0	0	0	0	0	0	0
	669	1	0	6	4	0	0	0	0	0	0	0	0
	670	1	0	6	4	0	0	0	0	0	0	0	0
	671	1	0	6	4	0	0	0	0	0	0	0	0
	672	1	0	6	4	0	0	0	0	0	0	0	0
	673	1	0	6	4	0	0	0	0	0	0	0	0
	674	1	0	7	4	0	0	0	0	0	0	0	0
	675	1	0	7	4	0	0	0	0	0	0	0	0
	676	1	0	7	3	0	0	0	0	0	0	0	0
	677	1	0	7	2	0	0	0	0	0	0	0	0
	678	1	0	7	2	0	0	0	0	0	0	0	0
	679	0	0	7	2	0	0	0	0	0	0	0	0
	680	0	0	7	2	0	0	0	0	0	0	0	0
	681	0	0	7	2	0	0	0	0	0	0	0	0
	682	0	0	8	2	0	0	0	0	0	0	0	0
	683	0	0	8	2	0	0	0	0	0	0	0	0
	684	0	0	8	2	0	0	0	0	0	0	0	0
	685	0	0	8	2	0	0	0	0	0	0	0	0
	686	0	0	8	2	0	0	0	0	0	0	0	0
	687	0	0	8	2	2	0	0	0	0	0	0	0
	688	0	0	8	2	2	0	0	0	0	0	0	0
	689	0	0	8	2	2	0	0	0	0	0	0	0
	690	0	0	9	2	2	0	0	0	0	0	0	0
	691	0	0	9	2	2	0	0	0	0	0	0	0
	692	0	0	8	2	2	0	0	0	0	0	0	0
	693	0	0	8	2	2	0	0	0	0	0	0	0
	694	0	0	8	2	2	0	0	0	0	0	0	0
	695	1	0	8	2	2	0	0	0	0	0	0	0
	696	1	0	8	2	2	0	0	0	0	0	0	0
	697	1	0	8	2	2	0	0	0	0	0	0	0
	698	1	0	8	2	2	0	0	0	0	0	0	0
	699	1	0	8	2	2	0	0	0	0	0	0	0
	700	1	0	8	2	2	0	0	0	0	0	0	0
	701	1	0	8	3	2	0	0	0	0	0	0	0
	702	1	0	8	2	0	0	0	0	0	0	0	0
	703	1	0	7	2	0	0	0	0	0	0	0	0
	704	1	0	7	2	0	0	0	0	2	0	0	0
	705	3	0	6	2	1	0	0	0	2	0	0	0
	706	3	0	5	2	2	0	0	0	2	0	0	0
	707	3	0	5	2	2	0	0	0	2	0	0	0
	708	3	0	5	2	2	0	0	0	2	0	0	0
	709	3	0	5	2	2	0	0	0	2	0	0	0
	710	3	0	5	2	2	0	0	0	2	0	0	0
	711	3	0	5	1	2	0	0	0	2	0	0	0
	712	5	0	5	1	3	0	0	0	2	0	0	0
	713	5	0	5	1	3	0	0	0	5	0	0	0
	714	5	0	5	1	3	0	0	0	5	0	0	0
	715	5	0	5	1	4	0	0	0	5	0	0	0
	716	5	0	5	1	4	0	0	0	5	0	0	0
	717	5	0	5	1	4	0	0	0	5	0	0	0
	718	5	0	4	1	4	0	0	0	5	0	0	0
	719	5	0	4	1	4	0	0	0	5	0	0	0
	720	5	0	3	1	4	0	0	0	5	0	0	0
	721	5	0	3	1	4	0	0	0	5	0	0	0
	722	5	0	3	1	4	0	0	0	5	0	0	0
	723	5	0	3	1	4	0	0	0	5	0	0	0
	724	5	0	3	1	4	0	0	0	5	0	0	0
	725	5	0	3	1	4	0	0	0	5	0	0	0
	726	4	0	3	1	4	0	0	0	5	0	0	0
	727	4	0	3	1	4	0	0	0	3	0	0	0
	728	4	0	3	1	3	0	0	0	3	0	0	0
	729	3	0	3	1	3	0	0	0	3	0	0	0
	730	3	0	3	1	3	0	0	0	3	0	0	0
	731	1	0	3	2	1	0	0	0	3	0	0	0
	732	1	0	3	2	1	0	0	0	2	0	0	0
	733	1	0	2	2	1	0	0	0	2	0	0	0
	734	1	1	2	2	1	0	0	0	2	0	0	0
	735	1	1	2	2	1	0	0	0	2	0	0	0
	736	1	1	2	2	1	0	0	0	2	0	0	0
	737	1	1	2	2	1	0	0	0	2	0	0	0
	738	1	1	2	6	1	0	0	0	2	0	0	0
	739	1	1	2	6	1	0	0	0	2	0	0	0
	740	1	1	2	6	0	0	0	0	2	0	0	0
	741	1	1	1	6	0	0	0	0	2	0	0	0
	742	1	1	1	6	0	0	0	0	2	0	0	0
	743	1	1	2	6	0	0	0	0	2	0	0	0
	744	1	1	2	6	0	0	0	0	2	0	0	0
	745	1	2	2	6	0	0	0	0	0	0	0	0
	746	1	3	2	6	0	0	0	0	0	0	0	0
	747	1	3	2	6	0	0	0	0	0	0	0	0
	748	1	3	2	6	0	0	0	0	0	0	0	0
	749	2	3	8	6	1	0	0	0	0	0	0	0
	750	2	3	8	6	1	0	0	0	0	0	0	0
	751	2	3	8	6	1	0	0	0	0	0	0	0
	752	2	3	8	5	1	0	0	0	0	0	0	0
	753	2	3	8	5	1	0	0	0	0	0	0	0
	754	2	3	8	5	1	0	0	0	0	0	0	0
	755	2	3	8	5	1	0	0	0	0	0	0	0
	756	2	3	8	5	1	0	0	0	0	0	0	0
	757	2	3	9	5	1	0	0	0	0	0	0	0
	758	2	3	9	5	1	0	0	0	0	0	0	0
	759	2	3	11	5	1	0	0	0	0	0	0	0
	760	2	3	11	5	1	0	0	0	0	0	0	0
	761	2	3	11	5	1	0	0	0	0	0	0	0
	762	2	3	11	5	1	0	0	0	0	0	0	0
	763	2	2	11	2	1	0	0	0	0	0	0	0
	764	1	2	11	2	1	0	0	0	0	0	0	0
	765	1	2	11	2	1	0	0	0	0	0	0	0
	766	1	2	11	2	0	0	0	0	0	0	0	0
	767	1	1	11	2	0	0	0	0	0	0	0	0
	768	1	1	11	2	0	0	0	0	0	0	0	0
	769	1	1	11	2	0	0	0	0	0	0	0	0
	770	1	1	11	2	0	0	0	0	0	0	0	0
	771	1	1	11	2	0	0	0	0	0	0	0	0
	772	1	1	11	2	0	0	0	0	0	0	0	0
	773	1	1	11	2	0	0	0	0	0	0	0	0
	774	1	1	11	2	0	0	0	0	0	0	0	0
	775	1	1	7	2	0	0	0	0	0	0	0	0
	776	0	1	6	2	0	0	0	0	0	0	0	0
	777	0	1	6	2	0	0	0	0	0	0	0	0
	778	0	1	6	2	0	0	0	0	0	0	0	0
	779	0	1	6	2	0	0	0	0	0	0	0	0
	780	0	1	6	2	0	0	0	0	0	0	0	0
	781	0	1	6	2	0	0	0	0	0	0	0	0
	782	0	1	6	1	0	0	0	0	0	0	0	0
	783	0	0	8	1	0	0	0	0	0	0	0	0
	784	0	0	8	1	0	0	0	0	0	0	0	0
	785	0	0	9	1	0	0	0	0	0	0	0	0
	786	0	0	10	1	0	0	0	0	0	0	0	0
	787	0	0	10	1	0	0	0	0	0	0	0	0
	788	0	0	10	1	0	0	0	0	0	0	0	0
	789	0	0	10	1	0	0	0	0	0	0	0	0
	790	0	0	10	1	0	0	0	0	0	0	0	0
	791	0	0	10	1	0	0	0	0	0	0	0	0
	792	0	0	10	1	0	0	0	0	0	0	0	0
	793	0	0	10	1	0	0	0	0	0	0	0	0
	794	0	0	10	1	0	0	0	0	0	0	0	0
	795	0	0	10	1	0	0	0	0	0	0	0	0
	796	0	0	10	1	0	0	0	0	0	0	0	0
	797	0	0	9	1	0	0	0	0	0	0	0	0
	798	0	0	9	1	0	0	0	0	0	0	0	0
	799	0	0	9	1	0	0	0	0	0	0	0	0
	800	0	0	9	2	0	0	0	0	0	0	0	0
	801	0	0	9	2	0	0	0	0	0	0	0	0
	802	0	0	9	2	0	0	0	0	0	0	0	0
	803	0	0	10	2	0	0	0	0	0	0	0	0
	804	0	0	10	2	0	0	0	0	0	0	0	0
	805	0	0	10	2	0	0	0	0	0	0	0	0
	806	0	0	10	2	0	0	0	0	0	0	0	0
	807	0	0	10	2	0	0	0	0	0	0	0	0
	808	0	0	9	2	0	0	0	0	0	0	0	0
	809	0	0	9	3	0	0	0	0	0	0	0	0
	810	0	0	7	3	0	0	0	0	0	0	0	0
	811	0	0	7	3	0	0	0	0	0	0	0	0
	812	0	0	8	3	0	0	0	0	0	0	0	0
	813	0	0	8	3	0	0	0	0	0	0	0	0
	814	0	0	9	2	0	0	0	0	0	0	0	0
	815	0	0	10	2	0	0	0	0	0	0	0	0
	816	0	0	10	2	0	0	0	0	0	0	0	0
	817	0	0	10	3	0	0	0	0	0	0	0	0
	818	0	0	10	3	0	0	0	0	0	0	0	0
	819	0	0	10	3	0	0	0	0	0	0	0	0
	820	0	0	10	3	0	0	0	0	0	0	0	0
	821	0	0	12	3	0	0	0	0	0	0	0	0
	822	0	0	12	3	0	0	0	0	0	0	0	0
	823	0	0	12	3	0	0	0	0	0	0	0	0
	824	0	0	12	3	0	0	0	0	0	0	0	0
	825	0	0	11	3	0	0	0	0	0	0	0	0
	826	0	0	11	3	0	0	0	0	0	0	0	0
	827	0	0	11	3	0	0	0	0	0	0	0	0
	828	0	0	11	3	0	0	0	0	0	0	0	0
	829	0	0	13	3	0	0	0	0	0	0	0	0
	830	0	0	13	3	0	0	0	0	0	0	0	0
	831	0	0	14	3	0	0	0	0	0	0	0	0
	832	0	0	14	3	0	0	0	0	0	0	0	0
	833	0	0	14	3	0	0	0	0	0	0	0	0
	834	0	0	13	3	0	0	0	0	0	0	0	0
	835	0	1	13	3	0	0	0	0	0	0	0	0
	836	0	1	12	3	0	0	0	0	0	0	0	0
	837	0	1	12	3	0	0	0	0	0	0	0	0
	838	0	1	12	4	0	0	0	0	0	0	0	0
	839	0	1	12	4	0	0	0	0	0	0	0	0
	840	1	1	13	4	0	0	0	0	0	0	0	0
	841	2	1	13	4	0	0	0	0	0	0	0	0
	842	2	1	13	4	0	0	0	0	0	0	0	0
	843	3	1	12	4	0	0	0	0	0	0	0	0
	844	3	1	14	4	0	0	0	0	0	0	0	0
	845	3	1	14	4	0	0	0	0	0	0	0	0
	846	3	1	14	5	0	0	0	0	0	0	0	0
	847	3	1	15	5	0	0	0	0	0	0	0	0
	848	3	1	15	5	0	0	0	0	0	0	0	0
	849	3	1	15	5	0	0	0	0	0	0	0	0
	850	3	1	15	5	0	0	0	0	0	0	0	0
	851	3	1	15	4	0	0	0	0	0	0	0	0
	852	3	1	15	4	0	0	0	0	0	0	0	0
	853	3	1	15	4	0	0	0	0	0	0	0	0
	854	3	1	14	5	0	0	0	0	0	0	0	0
	855	3	1	14	6	0	0	0	0	0	0	0	0
	856	3	1	14	6	0	0	0	0	0	0	0	0
	857	3	1	15	6	0	0	0	0	0	0	0	0
	858	3	1	15	6	0	0	0	0	0	0	0	0
	859	3	1	15	6	0	0	0	0	0	0	0	0
	860	0	1	15	5	0	0	0	0	0	0	0	0
	861	0	1	18	5	0	0	0	0	0	0	0	0
	862	0	1	18	5	0	0	0	0	0	0	0	0
	863	0	1	17	5	0	0	0	0	0	0	0	0
	864	0	1	17	5	0	0	0	0	0	0	0	0
	865	0	0	16	5	0	0	0	0	0	0	0	0
	866	0	0	15	5	0	0	0	0	0	0	0	0
	867	0	0	16	5	0	0	0	0	0	0	0	0
	868	0	0	16	4	0	0	0	0	0	0	0	0
	869	0	0	16	4	0	0	0	0	0	0	0	0
	870	0	0	17	4	0	0	0	0	0	0	0	0
	871	0	0	17	4	0	0	0	0	0	0	0	0
	872	0	0	15	4	0	0	0	0	0	0	0	0
	873	0	0	16	5	0	0	0	0	0	0	0	0
	874	0	0	17	5	0	0	0	0	0	0	0	0
	875	0	0	17	5	0	0	0	0	0	0	0	0
	876	0	0	17	5	0	0	0	0	2	0	0	0
	877	0	0	17	5	0	0	0	0	2	0	0	0
	878	0	0	17	5	0	0	0	0	2	0	0	0
	879	0	0	18	6	0	0	0	0	2	0	0	0
	880	0	0	17	8	0	0	0	0	2	0	0	0
	881	0	0	18	8	0	0	0	0	2	0	0	0
	882	0	0	17	8	0	0	0	0	2	0	0	0
	883	0	0	17	8	0	0	0	0	2	0	0	0
	884	0	0	17	8	0	0	0	0	2	0	0	0
	885	0	0	17	8	0	0	0	0	2	0	0	0
	886	0	1	18	8	0	0	0	0	2	0	0	0
	887	0	1	18	8	0	0	0	0	2	0	0	0
	888	0	1	17	8	0	0	0	0	3	0	0	0
	889	0	1	17	7	0	0	0	0	3	0	0	0
	890	0	1	17	8	0	0	0	0	3	0	0	0
	891	0	1	15	8	0	0	0	0	3	0	0	0
	892	0	1	15	8	0	0	0	0	3	0	0	0
	893	0	1	14	8	0	0	0	0	3	0	0	0
	894	0	1	13	8	0	0	0	0	3	0	0	0
	895	0	1	13	8	0	0	0	0	3	0	0	0
	896	0	1	14	8	0	0	0	0	3	0	0	0
	897	0	1	14	7	0	0	0	0	3	0	0	0
	898	0	1	14	8	0	0	0	0	3	0	0	0
	899	0	1	14	8	0	0	0	0	3	0	0	0
	900	0	1	15	8	0	0	0	0	3	0	0	0
	901	0	1	15	9	0	0	0	0	3	0	0	0
	902	0	1	15	9	0	0	0	0	3	0	0	0
	903	0	1	15	9	0	0	0	0	3	0	0	0
	904	0	1	15	9	0	0	0	0	3	0	0	0
	905	0	1	15	8	0	0	0	0	3	0	0	0
	906	0	1	15	7	0	0	0	0	1	0	0	0
	907	0	1	17	7	0	0	0	0	1	0	0	0
	908	0	1	16	7	0	0	0	0	1	0	0	0
	909	0	1	16	7	0	0	0	0	1	0	0	0
	910	0	1	17	7	0	0	0	0	1	0	0	0
	911	0	1	17	7	0	0	0	0	1	0	0	0
	912	0	1	14	7	0	0	0	0	0	0	0	0
	913	0	1	14	8	0	0	0	0	0	0	0	0
	914	0	1	14	8	0	0	0	0	0	0	0	0
	915	0	2	14	8	0	0	0	0	0	0	0	0
	916	0	2	15	8	0	0	0	0	0	0	0	0
	917	0	2	15	13	0	0	0	0	0	0	0	0
	918	0	1	15	14	0	0	0	0	0	0	0	0
	919	0	1	15	14	0	0	0	0	0	0	0	0
	920	0	1	15	14	0	0	0	0	0	0	0	0
	921	0	1	14	14	0	0	0	0	0	0	0	0
	922	0	1	14	14	0	0	0	0	0	0	0	0
	923	0	1	15	13	0	0	0	0	0	0	0	0
	924	0	1	14	12	0	0	0	0	0	0	0	0
	925	0	1	13	12	0	0	0	0	0	0	0	0
	926	0	1	16	12	0	0	0	0	0	0	0	0
	927	0	1	16	12	0	0	0	0	0	0	0	0
	928	0	1	16	12	0	0	0	0	0	0	0	0
	929	0	1	16	11	0	0	0	0	0	0	0	0
	930	0	1	15	10	0	0	0	0	0	0	0	0
	931	0	1	14	8	0	0	0	0	0	0	0	0
	932	0	1	13	13	0	0	0	0	0	0	0	0
	933	0	1	13	14	0	0	0	0	0	0	0	0
	934	0	1	16	14	0	0	0	0	0	0	0	0
	935	0	1	17	14	0	0	0	0	0	0	0	0
	936	0	0	19	15	0	0	0	0	0	0	0	0
	937	0	0	19	16	0	0	0	0	0	0	0	0
	938	0	0	19	16	0	0	0	0	0	0	0	0
	939	0	0	19	16	0	0	0	0	0	0	0	0
	940	0	0	20	18	0	0	0	0	0	0	0	0
	941	0	0	20	17	0	0	0	0	0	0	0	0
	942	0	0	21	18	0	0	0	0	0	0	0	0
	943	0	0	23	13	0	0	0	0	0	0	0	0
	944	0	0	24	13	0	0	0	0	0	0	0	0
	945	0	0	24	14	0	0	0	0	0	0	0	0
	946	0	0	25	14	0	0	0	0	0	0	0	0
	947	0	0	24	14	0	0	0	0	0	0	0	0
	948	0	0	24	15	0	0	0	0	0	0	0	0
	949	0	0	23	15	0	0	0	0	0	0	0	0
	950	0	0	23	15	0	0	0	0	0	0	0	0
	951	0	0	23	15	0	0	0	0	0	0	0	0
	952	0	0	21	15	0	0	0	0	0	0	0	0
	953	0	0	21	16	1	0	0	0	0	0	0	0
	954	0	0	21	17	1	0	0	0	0	0	0	0
	955	0	0	21	19	1	0	0	0	0	0	0	0
	956	0	0	21	19	1	0	0	0	0	0	0	0
	957	0	1	23	19	1	0	0	0	0	0	0	0
	958	0	1	23	20	1	0	0	0	0	0	0	0
	959	0	1	23	22	1	0	0	0	0	0	0	0
	960	0	1	23	22	1	0	0	0	0	0	0	0
	961	2	1	33	22	1	0	0	0	0	0	0	0
	962	3	1	34	24	1	0	1	0	0	0	0	0
	963	3	1	34	24	1	0	1	0	0	0	0	0
	964	3	1	34	23	1	0	1	0	0	0	0	0
	965	3	1	33	26	1	0	1	0	0	0	0	0
	966	3	2	33	26	1	0	2	0	0	0	0	0
	967	3	2	34	26	1	0	2	0	0	0	0	0
	968	3	3	34	27	1	0	2	0	0	0	0	0
	969	3	3	34	27	1	0	2	0	0	0	0	0
	970	3	3	35	28	1	0	2	0	0	0	0	0
	971	3	4	35	28	1	0	2	0	0	0	0	0
	972	3	4	37	29	1	0	2	0	0	0	0	0
	973	3	4	38	32	1	0	2	0	0	0	0	0
	974	3	4	38	32	2	0	2	0	0	0	0	0
	975	3	4	38	32	2	0	2	0	0	0	0	0
	976	3	4	41	32	2	0	2	0	0	0	0	0
	977	3	4	39	32	2	0	2	0	0	0	0	0
	978	2	3	40	33	1	0	2	0	0	0	0	0
	979	2	3	40	29	1	0	1	0	0	0	0	0
	980	0	3	41	30	1	0	1	0	0	0	0	0
	981	0	3	43	31	1	0	1	0	0	0	0	0
	982	0	3	45	31	1	0	1	0	0	0	0	0
	983	0	2	44	30	1	0	1	0	0	0	0	0
	984	0	2	44	30	1	0	1	0	0	0	0	0
	985	0	1	43	32	1	0	1	0	0	0	0	0
	986	0	1	42	29	1	0	1	0	0	0	0	0
	987	0	1	41	28	1	0	1	0	0	0	0	0
	988	0	1	40	27	1	0	1	0	0	0	0	0
	989	0	1	40	28	1	0	1	0	0	0	0	0
	990	0	0	35	28	1	0	0	0	0	0	0	0
	991	0	0	34	27	1	0	0	0	0	0	0	0
	992	0	0	34	28	1	0	0	0	0	0	0	0
	993	0	0	33	27	1	0	0	0	0	0	0	0
	994	0	0	31	30	1	0	0	0	0	0	0	0
	995	0	0	29	31	1	0	0	0	0	0	0	0
	996	0	0	28	30	1	0	0	0	0	0	0	0
	997	0	0	27	32	1	0	0	0	0	0	0	0
	998	0	0	25	32	1	0	0	0	0	0	0	0
	999	0	0	25	34	1	0	0	0	0	0	0	0
	1000	0	0	27	34	1	0	0	0	0	0	0	0
	1001	0	0	26	36	1	0	0	0	0	0	0	0
	1002	0	1	25	44	1	0	0	0	0	0	0	0
	1003	0	1	29	45	1	0	0	0	0	0	0	0
	1004	0	1	29	47	1	0	0	0	0	0	0	0
	1005	0	1	30	53	1	0	0	0	0	0	0	0
	1006	0	1	30	55	1	0	0	0	0	0	0	0
	1007	0	1	30	58	0	0	0	0	0	0	0	0
	1008	0	1	29	62	0	0	0	0	0	0	0	0
	1009	0	1	32	63	0	0	0	0	0	0	0	0
	1010	0	1	34	63	0	0	0	0	0	0	0	0
	1011	0	1	35	68	0	0	0	0	0	0	0	0
	1012	0	1	34	70	0	0	0	0	0	0	0	0
	1013	0	1	34	70	0	0	0	0	0	0	0	0
	1014	0	1	35	70	0	0	0	0	0	0	0	0
	1015	0	1	35	71	0	0	0	0	0	0	0	0
	1016	0	1	36	72	0	0	0	0	0	0	0	0
	1017	0	0	36	77	0	0	0	0	0	0	0	0
	1018	0	0	36	81	0	0	0	0	0	0	0	0
	1019	0	0	36	81	0	0	0	0	0	0	0	0
	1020	0	0	37	81	0	0	0	0	0	0	0	0
	1021	0	0	39	82	0	0	0	0	0	0	0	0
	1022	0	0	40	84	0	0	0	0	0	0	0	0
	1023	0	0	40	85	0	0	0	0	0	0	0	0
	1024	0	0	35	84	0	0	0	0	0	0	0	0
	1025	0	0	41	86	0	0	0	0	0	0	0	0
	1026	0	0	38	87	0	0	0	0	0	0	0	0
	1027	1	0	41	88	0	0	0	0	0	0	0	0
	1028	1	0	41	91	0	0	0	0	0	0	0	0
	1029	1	0	41	91	0	0	0	0	0	0	0	0
	1030	1	0	42	92	0	0	0	0	0	0	0	0
	1031	1	0	41	95	0	0	0	0	0	0	0	0
	1032	1	0	35	100	0	0	0	0	0	0	0	0
	1033	1	0	33	101	0	0	0	0	3	0	0	0
	1034	1	0	33	104	0	0	2	0	3	0	0	0
	1035	1	0	35	106	0	0	2	0	3	0	0	0
	1036	1	0	36	106	0	0	2	0	3	0	0	0
	1037	1	0	37	107	0	0	2	0	3	0	0	0
	1038	1	0	36	107	0	0	2	0	3	0	0	0
	1039	1	1	36	108	0	0	2	0	3	0	0	0
	1040	1	1	37	112	0	0	2	0	3	0	0	0
	1041	1	1	38	112	0	0	2	0	3	0	0	0
	1042	1	1	38	113	0	0	2	0	3	0	0	0
	1043	1	1	38	118	0	0	2	0	3	0	0	0
	1044	1	1	40	122	0	0	2	0	3	0	0	0
	1045	1	1	40	123	0	0	2	0	3	0	0	0
	1046	1	1	39	126	0	0	2	0	3	0	0	0
	1047	1	1	38	127	0	0	2	0	3	0	0	0
	1048	0	1	38	127	0	0	2	0	3	0	0	0
	1049	0	1	38	129	0	0	2	0	3	0	0	0
	1050	0	1	39	132	0	0	2	0	3	0	0	0
	1051	0	1	38	132	0	0	2	0	3	0	0	0
	1052	0	1	38	136	0	0	2	0	3	0	0	0
	1053	2	1	38	129	0	0	2	0	0	0	0	0
	1054	2	0	34	131	0	0	0	0	0	0	0	0
	1055	2	0	34	133	0	0	0	0	0	0	0	0
	1056	2	0	35	130	0	0	0	0	0	0	0	0
	1057	2	0	35	130	0	0	0	0	0	0	0	0
	1058	2	0	36	131	0	0	0	0	0	0	0	0
	1059	2	0	37	134	0	0	0	0	0	0	0	0
	1060	2	1	37	136	0	0	0	0	0	0	0	0
	1061	2	1	35	135	0	0	0	0	0	0	0	0
	1062	2	1	37	140	0	0	0	0	0	0	0	0
	1063	2	1	37	138	0	0	0	0	0	0	0	0
	1064	2	1	36	144	0	0	0	0	0	0	0	0
	1065	2	1	35	148	0	0	0	0	0	0	0	0
	1066	2	1	38	150	0	0	0	0	0	0	0	0
	1067	2	2	45	149	0	0	0	0	0	0	0	0
	1068	6	2	48	146	0	0	0	0	0	0	0	0
	1069	6	2	47	136	0	0	0	0	0	0	0	0
	1070	6	2	47	137	0	0	0	0	0	0	0	0
	1071	6	2	45	144	0	0	2	0	0	0	0	0
	1072	7	2	42	144	0	0	2	0	0	0	0	0
	1073	7	2	41	143	0	0	2	0	0	0	0	0
	1074	6	2	41	142	0	0	2	0	0	0	0	0
	1075	7	2	41	141	0	0	2	0	0	0	0	0
	1076	6	2	39	143	0	0	2	0	0	0	0	0
	1077	6	2	39	141	0	0	2	0	0	0	0	0
	1078	6	3	38	138	0	0	2	0	0	0	0	0
	1079	6	3	39	135	0	0	2	0	0	0	0	0
	1080	6	3	43	140	0	0	2	0	0	0	0	0
	1081	6	4	44	152	1	0	2	0	0	0	0	0
	1082	6	4	45	144	1	0	2	0	0	0	0	0
	1083	6	4	45	142	1	0	2	0	0	0	0	0
	1084	7	5	46	143	1	0	2	0	0	0	0	0
	1085	7	6	41	143	1	0	2	0	0	0	0	0
	1086	7	6	38	142	1	0	2	0	0	0	0	0
	1087	7	6	38	141	1	0	2	0	0	0	0	0
	1088	7	7	44	142	1	0	2	0	0	0	0	0
	1089	7	7	45	146	1	0	2	0	0	0	0	0
	1090	7	9	46	145	1	0	2	0	0	0	0	0
	1091	5	9	44	149	1	0	2	0	0	0	0	0
	1092	5	9	44	150	1	0	2	1	0	0	0	0
	1093	5	10	46	153	1	0	2	1	0	0	0	0
	1094	5	10	46	157	1	0	0	1	0	0	0	0
	1095	5	11	44	155	1	0	0	1	0	0	0	0
	1096	5	12	45	155	0	0	0	1	0	0	0	0
	1097	5	12	46	152	0	0	0	1	0	0	0	0
	1098	5	12	48	151	0	0	0	1	0	0	0	0
	1099	5	12	48	143	0	0	0	1	0	0	0	0
	1100	5	12	43	143	0	0	0	1	0	0	0	0
	1101	5	12	42	141	0	0	0	1	0	0	0	0
	1102	5	12	41	140	0	0	0	1	0	0	0	0
	1103	3	12	41	134	0	0	0	1	0	0	1	0
	1104	3	10	42	138	0	0	0	1	0	0	1	0
	1105	1	10	42	135	0	0	0	1	0	0	1	0
	1106	2	10	43	133	0	0	0	1	0	0	1	0
	1107	2	9	41	137	0	0	0	1	0	0	1	0
	1108	1	9	36	136	0	0	0	1	0	0	1	0
	1109	1	9	36	131	0	0	0	1	3	0	1	0
	1110	1	9	36	129	0	0	0	1	3	0	1	0
	1111	1	9	33	126	0	0	0	1	3	0	1	0
	1112	1	6	35	128	0	0	0	1	3	0	1	0
	1113	1	5	32	128	0	0	0	1	3	0	1	0
	1114	1	4	32	133	0	0	0	1	3	0	1	0
	1115	1	3	32	134	0	0	0	0	3	0	1	0
	1116	1	3	32	139	0	0	0	0	3	0	1	0
	1117	1	3	28	139	0	0	0	0	3	0	1	0
	1118	1	3	26	144	0	0	0	0	3	0	1	0
	1119	1	0	25	143	0	0	0	0	3	0	1	0
	1120	1	0	25	145	0	0	0	0	3	0	1	0
	1121	1	0	25	146	0	0	0	0	3	0	1	0
	1122	1	0	25	146	0	0	0	0	3	0	1	0
	1123	1	0	26	142	0	0	0	0	3	0	1	0
	1124	1	0	26	142	0	0	0	0	3	0	1	0
	1125	1	0	28	146	0	0	0	0	3	0	1	0
	1126	0	0	28	148	0	0	0	0	2	0	1	0
	1127	0	0	28	149	0	0	0	0	0	0	1	0
	1128	0	0	27	152	0	0	0	0	0	0	1	0
	1129	0	0	26	149	0	0	0	0	0	0	1	0
	1130	0	0	24	152	0	0	0	0	0	0	1	0
	1131	0	0	24	152	0	0	0	0	0	0	1	0
	1132	0	0	22	153	0	0	0	0	0	0	1	0
	1133	0	0	21	158	0	0	0	0	0	0	1	0
	1134	0	0	20	159	0	0	0	0	0	0	1	0
	1135	0	0	21	157	0	0	0	0	0	0	1	0
	1136	0	0	22	159	0	0	0	0	0	0	1	0
	1137	0	0	22	160	0	0	0	0	0	0	1	0
	1138	0	0	25	159	0	0	0	0	0	0	1	0
	1139	0	0	28	160	0	0	0	0	0	0	1	0
	1140	0	0	27	160	0	0	0	0	0	0	1	0
	1141	0	0	27	166	0	0	0	0	0	0	1	0
	1142	0	0	26	161	0	0	0	0	0	0	1	0
	1143	0	1	26	160	0	0	0	0	0	0	1	0
	1144	0	1	26	156	0	0	0	0	0	0	1	0
	1145	0	1	26	153	0	0	0	0	0	0	1	0
	1146	0	1	26	158	0	0	0	0	0	0	1	0
	1147	0	1	25	155	0	0	0	0	0	0	1	0
	1148	0	1	24	156	0	0	0	0	0	0	1	0
	1149	0	1	23	160	0	0	0	0	0	0	1	0
	1150	0	2	28	161	0	0	0	0	0	0	0	0
	1151	1	2	31	161	0	0	0	0	0	0	1	0
	1152	1	2	32	166	0	0	0	0	0	0	1	0
	1153	1	2	32	166	0	0	0	0	0	0	1	0
	1154	1	2	32	167	0	0	0	0	0	0	0	0
	1155	1	3	32	162	0	0	0	0	0	0	0	0
	1156	2	4	32	163	0	0	0	0	0	0	0	0
	1157	2	4	32	159	0	0	0	0	0	0	0	0
	1158	3	6	33	161	0	0	0	0	0	0	0	0
	1159	3	8	32	162	0	0	0	0	0	0	0	0
	1160	3	11	30	167	0	0	0	0	0	0	0	0
	1161	3	12	23	169	0	0	0	0	0	0	0	0
	1162	3	12	23	169	0	0	0	0	0	0	0	0
	1163	4	13	21	171	0	0	0	0	0	0	0	0
	1164	4	12	22	167	0	0	0	0	0	0	0	0
	1165	4	12	22	165	0	0	0	0	0	0	0	0
	1166	4	18	23	165	0	0	0	0	0	0	0	0
	1167	4	21	23	158	0	0	0	0	0	0	0	0
	1168	4	23	25	159	0	0	0	0	0	0	0	0
	1169	3	23	25	154	0	0	0	0	0	0	0	0
	1170	3	23	25	155	0	0	0	0	0	0	0	0
	1171	3	23	26	154	0	0	0	0	0	0	0	0
	1172	3	23	26	153	0	0	0	0	0	0	0	0
	1173	3	23	26	149	0	0	0	0	0	0	0	0
	1174	3	24	25	152	0	0	0	0	0	0	0	0
	1175	2	24	26	153	0	0	3	0	0	0	0	0
	1176	2	27	24	151	0	0	3	0	0	0	0	0
	1177	2	31	24	149	0	0	3	0	0	0	0	0
	1178	2	33	23	146	0	0	3	0	0	0	0	0
	1179	2	1859	18	489	0	1	3	0	0	4	0	3
	1180	2	138148	18	3291	0	68	3	8	0	86	0	11
	1181	4	155503	28	4065	0	77	3	9	0	91	0	12
	1182	6	171083	36	7683	0	88	3	16	0	95	0	21
	1183	8	172126	60	8195	0	88	3	17	0	96	0	23
	1184	8	172344	60	8255	0	88	3	17	0	96	0	23
	1185	8	172641	60	8335	0	89	3	17	0	97	0	23
	1186	8	172790	58	8354	0	89	3	17	0	98	0	23
	1187	8	172886	57	8369	0	89	3	17	0	98	0	23
	1188	7	172947	57	8381	0	89	3	17	0	98	0	23
	1189	7	172936	56	8387	0	89	3	17	0	98	0	23
	1190	7	172937	56	8385	0	89	3	17	0	98	0	23
	1191	6	172937	57	8382	0	89	3	17	0	98	0	23
	1192	36	172938	102	8377	0	89	3	17	0	98	0	23
	1193	77	172938	138	8376	0	89	3	17	0	98	0	23
	1194	77	172939	137	8378	1	89	3	17	0	98	0	23
	1195	77	172890	137	8380	1	89	3	17	0	98	0	23
	1196	77	172939	137	8384	1	89	3	17	0	98	0	23
	1197	77	172938	137	8383	1	89	3	17	0	98	0	23
	1198	77	172928	139	8383	1	89	3	17	0	98	0	23
	1199	77	172900	139	8387	1	89	3	17	0	98	0	23
	1200	77	172233	139	8379	1	89	3	17	0	98	0	23
	1201	76	167680	139	8246	2	85	3	16	0	96	0	23
	1202	76	34033	136	5164	2	17	0	11	0	10	0	10
	1203	77	383	134	164	2	0	0	0	0	0	0	0
	1204	77	80	124	148	2	0	0	0	0	0	0	0
	1205	80	80	125	146	2	0	0	0	0	0	0	0
	1206	82	74	123	148	2	0	0	0	0	0	0	0
	1207	82	70	116	145	2	0	0	0	0	0	0	0
	1208	82	64	116	146	2	0	0	0	0	0	0	0
	1209	82	41	115	149	2	0	0	0	0	0	0	0
	1210	82	40	113	153	2	0	0	0	0	0	0	0
	1211	83	49	113	158	2	0	0	0	0	0	0	0
	1212	85	62	101	165	2	0	0	0	0	0	0	0
	1213	86	69	102	166	2	0	0	0	1	0	0	0
	1214	89	467	102	164	2	0	0	0	1	0	0	0
	1215	91	316800	99	26641	2	48	0	73	1	74	0	120
	1216	91	357895	98	29990	3	52	0	80	1	84	0	126
	1217	89	379411	97	30110	3	58	0	80	1	86	0	126
	1218	89	382270	96	30150	3	59	0	81	3	86	0	126
	1219	84	382591	96	30191	4	59	0	81	3	86	0	126
	1220	81	383006	94	30202	4	59	0	81	3	87	0	127
	1221	80	383072	94	30206	4	59	0	81	3	87	0	127
	1222	80	383082	93	30208	4	59	0	81	3	87	0	127
	1223	75	383134	92	30207	3	59	0	81	3	87	0	127
	1224	73	383317	68	30206	3	59	0	81	3	87	0	127
	1225	73	383316	68	30201	3	59	0	81	3	87	0	127
	1226	63	383317	66	30200	3	59	0	81	3	87	0	127
	1227	40	383317	51	30199	3	59	0	81	3	87	0	127
	1228	29	383317	34	30200	3	59	0	81	3	87	0	127
	1229	27	383317	58	30202	3	59	0	81	3	87	0	127
	1230	22	383313	55	30178	3	59	0	81	3	87	1	127
	1231	20	383303	51	30167	3	59	0	81	3	87	1	127
	1232	19	383241	54	30168	3	58	0	81	3	87	1	127
	1233	18	383300	54	30166	3	59	3	81	3	87	1	127
	1234	17	383281	62	30159	3	59	3	81	3	87	4	127
	1235	16	382415	68	30152	3	59	3	81	3	85	4	127
	1236	10	379885	69	30144	0	57	3	81	0	84	4	127
	1237	10	21137	69	29168	0	8	3	72	0	9	4	119
	1238	9	20953	75	28894	0	8	3	67	1	9	4	118
	1239	7	1586	82	500	0	1	3	0	1	1	4	0
	1240	7	1688	82	500	0	1	3	0	1	1	4	0
	1241	7	1688	82	499	0	1	3	0	1	1	4	0
	1242	6	1688	80	497	0	1	3	0	1	1	4	0
	1243	4	1687	80	499	0	1	3	0	1	1	4	0
	1244	4	1687	80	500	0	1	3	0	1	1	4	0
	1245	4	1687	80	497	0	1	3	0	1	1	4	0
	1246	3	1686	78	494	0	1	3	0	1	1	4	0
	1247	4	1685	83	492	0	1	3	0	1	1	4	0
	1248	4	1685	83	491	0	1	3	0	1	1	4	0
	1249	4	1684	86	489	0	1	3	0	1	1	4	0
	1250	4	1681	86	487	0	1	3	0	1	1	4	0
	1251	3	1681	78	486	0	1	3	0	1	1	4	0
	1252	3	1677	75	482	0	1	3	0	1	1	4	0
	1253	3	1678	59	482	0	1	0	0	1	1	3	0
	1254	2	1674	54	479	0	1	0	0	1	1	1	0
	1255	2	1669	49	468	0	1	0	0	0	1	0	0
	1256	1	1658	49	458	0	1	0	0	0	1	0	0
	1257	1	1527	45	411	0	1	0	0	0	1	0	0
	1258	1	1092	43	300	0	1	0	0	0	0	0	0
	1259	1	115	41	102	0	0	0	0	0	0	0	0
	1260	1	27	40	72	0	0	0	0	0	0	0	0
	1261	1	15	41	70	0	0	0	0	0	0	0	0
	1262	1	6	35	70	0	0	0	0	0	0	0	0
	1263	1	4	30	69	0	0	0	0	0	0	0	0
	1264	0	4	30	68	0	0	0	0	0	0	0	0
	1265	0	3	30	67	0	0	0	0	0	0	0	0
	1266	0	3	29	64	0	0	0	0	0	0	0	0
	1267	0	3	22	61	0	0	0	0	0	0	0	0
	1268	0	3	16	58	0	0	0	0	0	0	0	0
	1269	0	3	17	55	0	0	0	0	0	0	0	0
	1270	0	1	17	55	0	0	0	0	0	0	0	0
	1271	0	0	16	54	0	0	0	0	0	0	0	0
	1272	0	0	16	54	0	0	0	0	0	0	0	0
	1273	0	0	11	50	0	0	0	0	0	0	0	0
	1274	0	1	10	48	0	0	0	0	0	0	0	0
	1275	0	1	10	47	0	0	0	0	0	0	0	0
	1276	0	1	6	47	0	0	0	0	0	0	0	0
	1277	1	1	6	46	0	0	0	0	0	0	0	0
	1278	1	1	6	46	0	0	0	0	0	0	0	0
	1279	1	1	6	43	0	0	0	0	0	0	0	0
	1280	1	1	6	42	0	0	0	0	0	0	0	0
	1281	1	1	6	41	0	0	0	0	0	0	0	0
	1282	1	1	6	42	0	0	0	0	0	0	0	0
	1283	1	1	6	39	0	0	0	0	0	0	0	0
	1284	1	1	6	37	1	0	0	0	0	0	0	0
	1285	1	1	6	35	1	0	0	0	0	0	0	0
	1286	1	1	6	35	1	0	0	0	0	0	0	0
	1287	1	1	5	36	1	0	0	0	0	0	0	0
	1288	1	1	5	34	1	0	0	0	0	0	0	0
	1289	1	1	5	34	1	0	0	0	0	0	0	0
	1290	1	1	5	33	1	0	0	0	0	0	0	0
	1291	1	1	5	35	1	0	0	0	0	0	0	0
	1292	1	0	5	34	1	0	0	0	0	0	0	0
	1293	1	0	5	34	1	0	0	0	0	0	0	0
	1294	0	0	5	34	1	0	0	0	0	0	0	0
	1295	0	0	5	33	1	0	0	0	0	0	0	0
	1296	0	0	5	33	1	0	0	0	0	0	0	0
	1297	0	0	5	34	1	0	0	0	0	0	0	0
	1298	0	0	5	32	1	0	0	0	0	0	0	0
	1299	0	0	5	32	1	0	0	0	0	0	0	0
	1300	0	0	5	34	1	0	0	0	0	0	0	0
	1301	0	0	6	33	1	0	0	0	0	0	0	0
	1302	0	0	6	31	1	0	0	0	0	0	0	0
	1303	0	0	6	31	1	0	0	0	0	0	0	0
	1304	0	0	7	29	1	0	0	0	0	0	0	0
	1305	0	0	7	29	0	0	0	0	0	0	0	0
	1306	0	0	6	28	0	0	0	0	0	0	0	0
	1307	0	0	6	27	0	0	0	0	0	0	0	0
	1308	0	0	6	27	0	0	0	0	0	0	0	0
	1309	0	0	6	26	0	0	0	0	0	0	0	0
	1310	0	0	6	26	0	0	0	0	0	0	0	0
	1311	0	0	4	26	0	0	0	0	0	0	0	0
	1312	0	0	3	26	0	0	0	0	0	0	0	0
	1313	0	0	3	25	0	0	0	0	0	0	0	0
	1314	0	0	3	25	0	0	0	0	0	0	0	0
	1315	0	0	3	25	0	0	0	0	0	0	0	0
	1316	0	1	4	24	0	0	0	0	0	0	0	0
	1317	0	1	4	25	0	0	0	0	0	0	0	0
	1318	0	1	4	24	0	0	0	0	0	0	0	0
	1319	0	1	4	23	0	0	0	0	0	0	0	0
	1320	0	1	3	23	0	0	0	0	0	0	0	0
	1321	0	1	3	24	0	0	0	0	0	0	0	0
	1322	0	1	3	24	0	0	0	0	0	0	0	0
	1323	0	1	3	24	0	0	0	0	0	0	0	0
	1324	0	1	3	25	0	0	0	0	0	0	0	0
	1325	0	1	3	25	0	0	0	0	0	0	0	0
	1326	0	1	3	25	0	0	0	0	0	0	0	0
	1327	0	1	3	25	0	0	0	0	0	0	0	0
	1328	0	1	3	25	0	0	0	0	0	0	0	0
	1329	0	1	3	23	0	0	0	0	0	0	0	0
	1330	0	1	3	23	0	0	0	0	0	0	0	0
	1331	0	1	4	23	0	0	0	0	0	0	0	0
	1332	0	1	4	23	0	0	0	0	0	0	0	0
	1333	0	1	4	22	0	0	0	0	0	0	0	0
	1334	0	1	5	22	0	0	0	0	0	0	0	0
	1335	0	1	5	23	0	0	0	0	0	0	0	0
	1336	0	1	5	22	0	0	0	0	0	0	0	0
	1337	0	1	5	21	0	0	0	0	0	0	0	0
	1338	0	1	5	19	0	0	0	0	0	0	0	0
	1339	0	1	5	21	0	0	0	0	0	0	0	0
	1340	0	0	5	20	0	0	0	0	0	0	0	0
	1341	0	0	5	20	0	0	0	0	0	0	0	0
	1342	0	0	5	19	0	0	0	0	0	0	0	0
	1343	0	0	5	18	0	0	0	0	0	0	0	0
	1344	0	1	5	18	0	0	0	0	0	0	0	0
	1345	0	1	5	18	0	0	0	0	0	0	0	0
	1346	0	1	5	18	0	0	0	0	0	0	0	0
	1347	0	1	5	18	0	0	0	0	0	0	0	0
	1348	0	1	5	19	0	0	0	0	0	0	0	0
	1349	0	2	5	18	0	0	0	0	0	0	0	0
	1350	0	2	5	18	0	0	0	0	0	0	0	0
	1351	0	2	5	19	0	0	0	0	0	0	0	0
	1352	0	2	4	18	0	0	0	0	0	0	0	0
	1353	0	2	5	18	0	0	0	0	0	0	0	0
	1354	0	2	5	17	0	0	0	0	0	0	0	0
	1355	0	2	4	18	0	0	0	0	0	0	0	0
	1356	0	3	4	19	0	0	0	0	0	0	0	0
	1357	0	4	4	20	0	0	0	0	0	0	0	0
	1358	0	4	4	21	0	0	0	0	0	0	0	0
	1359	0	4	4	19	0	0	0	0	0	0	0	0
	1360	0	4	4	18	0	0	0	0	0	0	0	0
	1361	0	4	4	19	0	0	0	0	0	0	0	0
	1362	0	4	4	19	0	0	0	0	0	0	0	0
	1363	0	4	4	20	0	0	0	0	0	0	0	0
	1364	0	4	4	20	0	0	0	0	0	0	0	0
	1365	0	4	4	19	0	0	0	0	0	0	0	0
	1366	0	4	4	19	0	0	0	0	0	0	0	0
	1367	0	4	3	19	0	0	0	0	0	0	0	0
	1368	0	3	3	17	0	0	0	0	0	0	0	0
	1369	0	3	3	15	0	0	0	0	0	0	0	0
	1370	0	3	3	15	0	0	0	0	0	0	0	0
	1371	0	5	3	16	0	0	0	0	0	0	0	0
	1372	0	6	3	15	0	0	0	0	0	0	0	0
	1373	0	6	3	22	0	0	0	0	0	0	0	0
	1374	0	4	3	27	0	0	0	0	0	0	0	0
	1375	0	5	2	29	0	0	0	0	0	0	0	0
	1376	0	5	2	29	0	0	0	0	0	0	0	0
	1377	0	4	2	29	0	0	0	0	0	0	0	0
	1378	0	4	2	32	0	0	0	0	0	0	0	0
	1379	0	4	2	32	0	0	0	0	0	0	0	0
	1380	0	5	2	32	0	0	0	0	0	0	0	0
	1381	0	5	2	32	0	0	0	0	0	0	0	0
	1382	0	5	1	31	0	0	0	0	0	0	0	0
	1383	0	5	2	30	0	0	0	0	0	0	0	0
	1384	0	5	3	30	0	0	0	0	0	0	0	0
	1385	0	5	4	30	0	0	0	0	0	0	0	0
	1386	0	7	4	29	0	0	0	0	0	0	0	0
	1387	0	8	4	29	0	0	0	0	0	0	0	0
	1388	0	9	4	29	0	0	0	0	0	0	0	0
	1389	0	10	4	40	0	0	0	0	0	0	0	0
	1390	0	10	4	40	0	0	0	0	0	0	0	0
	1391	0	10	4	40	0	0	0	0	0	0	0	0
	1392	1	10	4	40	0	0	0	0	0	0	0	0
	1393	1	9	4	33	0	0	0	0	0	0	0	0
	1394	1	10	4	33	0	0	0	0	0	0	0	0
	1395	0	10	4	33	0	0	0	0	0	0	0	0
	1396	1	10	4	33	0	0	0	0	0	0	0	0
	1397	1	10	4	33	0	0	0	0	0	0	0	0
	1398	1	9	4	33	0	0	0	0	0	0	0	0
	1399	1	9	4	31	0	0	0	0	0	0	0	0
	1400	1	9	4	31	0	0	0	0	0	0	0	0
	1401	1	8	4	24	0	0	0	0	0	0	0	0
	1402	2	8	5	24	0	0	0	0	0	0	0	0
	1403	2	6	5	24	0	0	0	0	0	0	0	0
	1404	2	6	5	24	0	0	0	0	0	0	0	0
	1405	2	6	5	24	0	0	0	0	0	0	0	0
	1406	2	5	5	24	0	0	0	0	0	2	0	0
	1407	2	3	5	17	0	0	0	0	0	2	0	0
	1408	2	2	5	13	0	0	0	0	0	2	0	0
	1409	2	2	5	12	0	0	0	0	0	2	0	0
	1410	2	2	5	9	0	0	0	0	0	2	0	0
	1411	2	2	5	8	0	0	0	0	0	2	0	0
	1412	2	2	6	8	0	0	0	0	0	2	0	0
	1413	2	2	6	8	0	0	0	0	0	2	0	0
	1414	1	1	6	7	0	0	0	0	0	2	0	0
	1415	1	1	7	7	0	0	0	0	0	2	0	0
	1416	1	1	7	7	0	0	0	0	0	2	0	0
	1417	1	0	7	8	0	0	0	0	0	2	0	0
	1418	1	0	7	8	0	0	0	0	0	2	0	0
	1419	1	0	7	8	0	0	0	0	0	2	0	0
	1420	1	0	7	8	0	0	0	0	0	2	0	0
	1421	1	0	7	8	0	0	0	0	0	2	0	0
	1422	1	0	7	8	0	0	0	0	0	2	0	0
	1423	1	0	7	9	0	0	0	0	0	2	0	0
	1424	1	0	7	9	0	0	0	0	0	2	0	0
	1425	1	0	7	8	0	0	0	0	0	2	0	0
	1426	1	0	7	8	0	0	0	0	0	2	0	0
	1427	1	0	7	8	0	0	0	0	0	2	0	0
	1428	0	0	7	8	0	0	0	0	0	2	0	0
	1429	0	0	7	5	0	0	0	0	0	0	0	0
	1430	0	0	7	5	0	0	0	0	0	0	0	0
	1431	0	0	6	5	0	0	0	0	0	0	0	0
	1432	0	0	6	5	0	0	0	0	0	0	0	0
	1433	0	0	6	5	0	0	0	0	0	0	0	0
	1434	0	0	5	5	0	0	0	0	0	0	0	0
	1435	0	0	4	5	0	0	0	0	0	0	0	0
	1436	0	0	2	5	0	0	0	0	0	0	0	0
	1437	0	0	2	5	0	0	0	0	0	0	0	0
	1438	0	0	2	5	0	0	0	0	0	0	0	0
	1439	0	0	2	5	0	0	0	0	0	0	0	0
	1440	0	0	2	6	0	0	0	0	0	0	0	0
	1441	0	0	2	5	0	0	0	0	0	0	0	0
	1442	0	0	2	5	0	0	0	0	0	0	0	0
	1443	0	0	2	5	0	0	0	0	0	0	0	0
	1444	0	0	2	5	0	0	0	0	0	0	0	0
	1445	0	0	2	5	0	0	0	0	0	0	0	0
	1446	0	0	2	5	0	0	0	0	0	0	0	0
	1447	0	0	2	5	0	0	0	0	0	0	0	0
	1448	0	0	2	5	0	0	0	0	0	0	0	0
	1449	0	0	2	5	0	0	0	0	0	0	0	0
	1450	0	0	2	5	0	0	0	0	0	0	0	0
	1451	0	0	1	5	0	0	0	0	0	0	0	0
	1452	0	0	1	5	0	0	0	0	0	0	0	0
	1453	0	0	1	5	0	0	0	0	0	0	0	0
	1454	0	0	1	5	0	0	0	0	0	0	0	0
	1455	0	0	1	5	0	0	0	0	0	0	0	0
	1456	0	0	1	5	0	0	0	0	0	0	0	0
	1457	0	0	1	5	0	0	0	0	0	0	0	0
	1458	0	0	1	5	0	0	0	0	0	0	0	0
	1459	0	0	5	5	0	0	0	0	0	0	0	0
	1460	0	0	5	5	0	0	0	0	0	0	0	0
	1461	0	0	4	5	0	0	0	0	0	0	0	0
	1462	0	0	4	6	0	0	0	0	0	0	0	0
	1463	0	0	4	6	0	0	0	0	0	0	0	0
	1464	0	0	4	7	0	0	0	0	0	0	0	0
	1465	1	0	4	7	0	0	0	0	1	0	0	0
	1466	1	0	4	7	0	0	0	0	1	0	0	0
	1467	1	0	4	7	0	0	0	0	1	0	0	0
	1468	1	0	4	6	0	0	0	0	1	0	0	0
	1469	1	0	4	6	0	0	0	0	1	0	0	0
	1470	1	1	4	6	0	0	0	0	1	0	0	0
	1471	1	1	4	6	0	0	0	0	1	0	0	0
	1472	1	1	4	12	0	0	0	0	1	0	0	0
	1473	1	1	4	13	0	0	0	0	1	0	0	0
	1474	2	1	5	16	0	0	0	0	2	0	0	0
	1475	2	1	5	14	0	0	0	0	2	0	0	0
	1476	2	1	5	16	0	0	0	0	2	0	0	0
	1477	2	1	5	16	2	0	0	0	3	0	0	0
	1478	2	1	5	17	2	0	0	0	4	0	0	0
	1479	2	1	5	17	2	0	0	0	4	0	0	0
	1480	2	1	5	17	2	0	0	0	4	0	0	0
	1481	2	1	9	17	2	0	0	0	4	0	0	0
	1482	2	1	9	17	2	0	0	0	4	0	0	0
	1483	2	1	9	17	2	0	0	0	4	0	0	0
	1484	2	1	8	17	2	0	0	0	4	0	0	0
	1485	2	1	8	17	2	0	0	0	4	0	0	0
	1486	2	1	5	18	2	0	0	0	4	0	0	0
	1487	2	1	5	18	2	0	0	0	4	0	0	0
	1488	2	1	5	18	2	0	0	0	4	0	0	0
	1489	2	1	5	17	2	0	0	0	4	0	0	0
	1490	2	1	5	14	2	0	0	0	3	0	0	0
	1491	1	1	5	13	2	0	0	0	3	0	0	0
	1492	1	2	5	13	2	0	0	0	3	0	0	0
	1493	1	2	5	11	2	0	0	0	2	0	0	0
	1494	1	2	5	11	2	0	0	0	2	0	0	0
	1495	1	2	5	11	2	0	0	0	2	0	0	0
	1496	1	2	5	11	2	0	0	0	2	0	0	0
	1497	1	2	5	11	2	0	0	0	2	0	0	0
	1498	1	3	5	11	2	0	0	0	2	0	0	0
	1499	1	3	5	11	2	0	0	0	2	0	0	0
	1500	1	3	5	11	2	0	0	0	2	0	0	0
	1501	1	3	5	5	2	0	0	0	2	0	0	0
	1502	1	3	5	5	2	0	0	0	2	0	0	0
	1503	1	3	5	5	2	0	0	0	2	0	0	0
	1504	0	3	1	5	2	0	0	0	2	0	0	0
	1505	0	3	1	5	2	1	0	0	2	0	0	0
	1506	0	2	1	6	2	1	0	0	2	0	0	0
	1507	0	2	1	6	2	1	0	0	2	0	0	0
	1508	0	2	2	6	0	1	0	0	0	0	0	0
	1509	0	2	2	6	0	1	0	0	0	0	0	0
	1510	0	2	2	6	0	1	0	0	0	0	0	0
	1511	0	2	2	6	0	1	0	0	1	0	0	0
	1512	0	2	2	6	0	1	0	0	1	0	0	0
	1513	0	2	2	5	0	1	0	0	1	0	0	0
	1514	0	2	2	5	0	1	0	0	1	0	1	0
	1515	0	2	2	4	0	1	0	0	1	0	1	0
	1516	0	1	2	5	0	1	0	0	1	0	1	0
	1517	0	1	2	5	1	1	0	0	1	0	1	0
	1518	0	1	2	5	1	1	0	0	1	0	1	0
	1519	0	1	2	5	1	1	0	0	1	0	1	0
	1520	0	1	2	5	1	1	0	0	1	0	1	0
	1521	0	1	2	5	1	1	0	0	1	0	1	0
	1522	0	1	2	5	1	1	0	0	1	0	1	0
	1523	0	1	2	5	1	0	0	0	1	0	1	0
	1524	0	1	2	4	1	0	0	0	1	0	1	0
	1525	0	0	1	4	1	0	0	0	1	0	1	0
	1526	0	0	1	4	1	0	0	0	1	0	1	0
	1527	0	0	1	4	1	0	0	0	1	0	1	0
	1528	0	0	2	3	1	0	0	0	1	0	1	0
	1529	0	0	2	3	1	0	0	0	1	0	1	0
	1530	0	0	2	3	1	0	0	0	1	0	1	0
	1531	0	2	2	3	1	0	0	0	1	0	1	0
	1532	0	2	2	3	1	0	0	0	1	0	1	0
	1533	0	2	2	3	1	0	0	0	1	0	1	0
	1534	0	2	2	3	1	0	0	0	1	0	1	0
	1535	0	2	2	4	0	0	0	0	1	0	1	0
	1536	0	3	2	4	0	0	0	0	2	0	1	0
	1537	0	3	2	4	0	0	0	0	2	0	1	0
	1538	0	3	2	4	0	0	0	0	2	0	1	0
	1539	0	3	2	4	0	0	0	0	2	0	1	0
	1540	0	3	2	4	0	0	0	0	2	0	1	0
	1541	0	3	2	4	0	0	0	0	2	0	1	0
	1542	0	3	2	4	0	0	0	0	2	0	1	0
	1543	0	3	2	4	0	0	0	0	2	0	1	0
	1544	0	3	2	4	0	0	0	0	2	0	1	0
	1545	0	3	2	4	0	0	0	0	2	0	1	0
	1546	0	3	2	4	0	0	0	0	2	0	1	0
	1547	0	3	2	4	0	0	0	0	2	0	0	0
	1548	0	3	2	4	3	0	0	0	2	0	0	0
	1549	0	3	2	4	3	0	0	0	2	0	0	0
	1550	0	3	2	4	3	0	0	0	2	0	0	0
	1551	0	2	2	4	3	0	0	0	0	0	0	0
	1552	0	2	2	4	3	0	0	0	0	0	0	0
	1553	0	2	2	4	3	0	0	0	0	0	0	0
	1554	0	2	2	5	3	0	0	0	0	0	0	0
	1555	0	2	2	5	3	0	0	0	0	0	0	0
	1556	0	2	2	5	3	0	0	0	0	0	0	0
	1557	0	0	2	5	3	0	0	0	0	0	0	0
	1558	0	0	2	6	3	0	0	0	0	0	0	0
	1559	0	0	1	6	3	0	0	0	0	0	0	0
	1560	0	0	1	7	3	0	0	0	0	0	0	0
	1561	0	0	1	7	3	0	0	0	0	0	0	0
	1562	0	0	2	8	3	0	0	0	0	0	0	0
	1563	0	0	2	8	3	0	0	0	0	0	0	0
	1564	0	0	2	8	3	0	0	0	0	0	0	0
	1565	0	0	2	8	3	0	0	0	0	0	0	0
	1566	0	0	2	7	3	0	0	0	0	0	0	0
	1567	0	0	2	8	2	0	0	0	0	0	0	0
	1568	0	0	2	8	2	0	0	0	0	0	0	0
	1569	0	1	2	9	2	0	0	0	0	0	0	0
	1570	0	1	2	9	3	0	0	0	0	0	0	0
	1571	1	1	2	9	3	0	0	0	4	0	0	0
	1572	2	1	2	9	3	0	0	0	4	0	0	0
	1573	2	1	2	9	4	0	0	0	4	0	0	0
	1574	3	1	2	9	4	0	0	0	6	0	0	0
	1575	4	1	2	9	4	0	0	0	6	0	0	0
	1576	4	1	2	9	4	0	0	0	6	0	0	0
	1577	4	1	2	9	4	0	0	0	6	0	0	0
	1578	4	1	2	9	4	0	0	0	6	0	0	0
	1579	5	1	1	9	4	0	0	0	6	0	0	0
	1580	5	1	1	9	4	0	0	0	6	0	0	0
	1581	5	1	1	9	4	0	0	0	6	0	0	0
	1582	5	1	1	9	4	0	0	0	6	0	0	0
	1583	5	1	1	9	4	0	0	0	6	0	0	0
	1584	5	1	1	9	4	0	0	0	7	0	0	0
	1585	5	1	1	9	6	0	0	0	7	0	0	0
	1586	5	0	1	8	6	0	0	0	7	0	0	0
	1587	5	0	1	8	6	0	0	0	7	0	0	0
	1588	5	0	1	7	6	0	0	0	7	0	0	0
	1589	5	0	1	7	5	0	0	0	7	0	0	0
	1590	4	0	1	7	4	0	0	0	3	0	0	0
	1591	4	0	1	7	2	0	0	0	3	0	0	0
	1592	4	0	1	9	2	0	0	0	3	0	0	0
	1593	4	0	1	9	2	0	0	0	3	0	0	0
	1594	4	0	1	9	2	0	0	0	3	0	0	0
	1595	4	0	1	9	2	0	0	0	3	0	0	0
	1596	4	0	1	9	2	0	0	0	3	0	0	0
	1597	4	0	1	9	2	0	0	0	3	0	0	0
	1598	4	0	1	9	2	0	0	0	3	0	0	0
	1599	4	0	1	9	2	0	0	0	3	0	0	0
	1600	4	0	1	9	2	0	0	0	3	0	0	0
	1601	4	0	1	9	2	0	0	0	3	0	0	0
	1602	4	0	1	9	2	0	0	0	3	0	0	0
	1603	4	0	1	10	2	0	0	0	3	0	0	0
	1604	4	0	1	10	2	0	0	0	3	0	0	0
	1605	3	0	1	9	2	0	0	0	2	0	0	0
	1606	3	0	1	9	2	0	0	0	2	0	0	0
	1607	2	0	1	9	2	0	0	0	2	0	0	0
	1608	0	0	1	8	2	0	0	0	1	0	0	0
	1609	0	0	1	7	2	0	0	0	0	0	0	0
	1610	0	0	1	7	2	0	0	0	0	0	0	0
	1611	0	0	1	6	2	0	0	0	0	0	0	0
	1612	0	0	1	6	2	0	0	0	0	0	0	0
	1613	0	0	0	5	2	0	0	0	0	0	0	0
	1614	0	0	0	5	2	0	0	0	0	0	0	0
	1615	0	0	0	5	0	0	0	0	0	0	0	0
	1616	0	0	0	5	0	0	0	0	0	0	0	0
	1617	0	0	0	5	0	0	0	0	0	0	0	0
	1618	0	0	0	4	0	0	0	0	0	0	0	0
	1619	0	0	0	4	0	0	0	0	0	0	0	0
	1620	0	0	0	3	0	0	0	0	0	0	0	0
	1621	0	0	0	3	0	0	0	0	0	0	0	0
	1622	0	0	0	4	0	0	0	0	0	0	0	0
	1623	0	0	0	4	0	0	0	0	0	0	0	0
	1624	0	0	0	4	0	0	0	0	0	0	0	0
	1625	0	0	0	4	0	0	0	0	0	0	0	0
	1626	0	0	0	5	1	0	0	0	0	0	0	0
	1627	0	0	0	5	1	0	0	0	0	0	0	0
	1628	0	0	0	5	1	0	0	0	0	0	0	0
	1629	0	0	0	5	1	0	0	0	0	0	0	0
	1630	0	0	0	5	1	0	0	0	0	0	0	0
	1631	0	0	0	5	1	0	0	0	0	0	0	0
	1632	0	0	0	5	1	0	0	0	0	0	0	0
	1633	0	0	0	5	1	0	0	0	0	0	0	0
	1634	0	0	0	5	1	0	0	0	0	0	0	0
	1635	0	0	0	5	1	0	0	0	0	0	0	0
	1636	0	1	0	5	1	0	0	0	0	0	0	0
	1637	0	1	0	5	1	0	0	0	0	0	0	0
	1638	0	1	0	5	1	0	0	0	0	0	0	0
	1639	0	1	0	5	1	0	0	0	0	0	0	0
	1640	0	1	0	6	1	0	0	0	0	0	0	0
	1641	0	1	0	6	1	0	0	0	0	0	0	0
	1642	0	1	0	4	1	0	0	0	0	0	0	0
	1643	0	1	0	4	1	0	0	0	0	0	0	0
	1644	0	1	0	4	1	0	0	0	0	0	0	0
	1645	0	1	0	4	1	0	0	0	0	0	0	0
	1646	0	1	0	4	1	0	0	0	0	0	0	0
	1647	0	1	0	4	0	0	0	0	0	0	0	0
	1648	0	1	0	4	0	0	0	0	0	0	0	0
	1649	0	1	0	4	0	0	0	0	0	0	0	0
	1650	0	1	0	5	0	0	0	0	0	0	0	0
	1651	0	1	0	5	0	0	0	0	0	0	0	0
	1652	1	1	0	5	0	0	0	0	0	0	0	0
	1653	1	1	0	5	0	0	0	0	0	0	0	0
	1654	1	1	0	4	0	0	0	0	0	0	0	0
	1655	1	1	0	4	0	0	0	0	0	0	0	0
	1656	1	1	0	4	0	0	0	0	0	0	0	0
	1657	1	1	0	4	0	0	0	0	5	0	0	0
	1658	1	1	0	4	0	0	0	0	5	0	0	0
	1659	1	1	0	4	0	0	0	0	5	0	0	0
	1660	1	1	0	4	0	0	0	0	5	0	0	0
	1661	1	1	0	4	0	0	0	0	5	0	0	0
	1662	1	1	0	4	0	0	0	0	7	0	0	0
	1663	1	2	0	4	0	0	0	0	7	0	0	0
	1664	1	2	0	4	0	0	0	0	7	0	0	0
	1665	1	2	0	4	2	0	0	0	7	0	0	0
	1666	1	2	0	4	2	0	0	0	7	0	0	0
	1667	2	2	0	5	3	0	0	0	7	0	0	0
	1668	2	2	0	5	3	0	0	0	7	0	0	0
	1669	2	2	0	5	3	0	0	0	7	0	0	0
	1670	2	2	0	5	3	0	0	0	8	0	0	0
	1671	2	2	0	5	3	0	0	0	9	0	0	0
	1672	2	1	0	5	3	0	0	0	9	0	0	0
	1673	2	1	0	4	3	0	0	0	10	0	0	0
	1674	2	1	0	4	3	0	0	0	10	0	0	0
	1675	3	1	0	4	3	0	0	0	10	0	0	0
	1676	3	1	0	4	3	0	0	0	10	0	0	0
	1677	3	1	0	3	3	0	0	0	10	0	0	0
	1678	3	1	0	3	4	0	0	0	9	0	0	0
	1679	3	1	0	4	4	0	0	0	9	0	0	0
	1680	3	1	0	4	4	0	0	0	8	0	0	0
	1681	3	1	0	5	4	0	0	0	8	0	0	0
	1682	3	1	0	5	4	0	0	0	6	0	0	0
	1683	2	0	1	6	4	0	0	0	4	0	0	0
	1684	2	0	1	6	2	0	0	0	4	0	0	0
	1685	2	0	1	6	2	0	0	0	4	0	0	0
	1686	2	0	1	6	2	0	0	0	4	0	0	0
	1687	2	0	1	6	1	0	0	0	2	0	0	0
	1688	2	0	1	6	1	0	0	0	2	0	0	0
	1689	1	0	1	6	1	0	0	0	2	0	0	0
	1690	1	0	1	6	1	0	0	0	2	0	0	0
	1691	1	0	1	5	1	0	0	0	1	0	0	0
	1692	1	0	2	5	1	0	0	0	1	0	0	0
	1693	1	0	2	5	1	0	0	0	1	0	0	0
	1694	1	0	2	5	1	0	0	0	1	0	0	0
	1695	1	0	2	5	1	0	0	0	1	0	0	0
	1696	1	0	2	5	1	0	0	0	1	0	0	0
	1697	1	0	2	5	1	0	0	0	1	0	0	0
	1698	1	0	2	5	1	0	0	0	1	0	0	0
	1699	1	0	2	5	1	0	0	0	1	0	0	0
	1700	1	0	2	5	1	0	0	0	1	0	0	0
	1701	0	0	2	4	0	0	0	0	0	0	0	0
	1702	0	0	2	4	0	0	0	0	0	0	0	0
	1703	0	0	2	4	0	0	0	0	0	0	0	0
	1704	0	0	3	4	0	0	0	0	0	0	0	0
	1705	0	0	3	5	0	0	0	0	0	0	0	0
	1706	0	0	4	5	0	0	0	0	0	0	0	0
	1707	0	0	4	5	0	0	0	0	0	0	0	0
	1708	0	0	4	5	0	0	0	0	0	0	0	0
	1709	0	0	4	5	0	0	0	0	1	0	0	0
	1710	0	0	4	5	0	0	0	0	1	0	0	0
	1711	0	0	4	5	0	0	0	0	1	0	0	0
	1712	0	0	4	5	0	0	0	0	1	0	0	0
	1713	0	0	4	5	0	0	0	0	1	0	0	0
	1714	0	0	4	5	0	0	0	0	1	0	0	0
	1715	0	0	4	5	0	0	0	0	1	0	0	0
	1716	0	0	4	5	0	0	0	0	1	0	0	0
	1717	0	0	4	6	0	0	0	0	1	0	0	0
	1718	0	0	4	5	0	0	0	0	1	0	0	0
	1719	0	0	4	5	1	0	0	0	1	0	0	0
	1720	0	0	4	5	3	0	0	0	1	0	0	0
	1721	0	0	4	5	3	0	0	0	1	0	0	0
	1722	0	0	4	5	3	0	0	0	1	0	0	0
	1723	0	0	4	6	5	0	0	0	1	0	0	0
	1724	0	0	4	6	5	0	0	0	1	0	0	0
	1725	0	0	4	6	5	0	0	0	1	0	0	0
	1726	0	0	4	6	5	0	0	0	1	0	0	0
	1727	0	0	4	6	5	0	0	0	2	0	0	0
	1728	0	0	4	6	5	0	0	0	2	0	0	0
	1729	0	0	4	6	5	0	0	0	2	0	0	0
	1730	0	0	4	5	5	0	0	0	2	0	0	0
	1731	0	0	4	5	5	0	0	0	2	0	0	0
	1732	0	0	5	4	5	0	0	0	1	0	0	0
	1733	0	0	5	4	5	0	0	0	1	0	0	0
	1734	0	0	4	3	5	0	0	0	1	0	0	0
	1735	0	0	4	3	5	0	0	0	2	0	0	0
	1736	0	0	4	3	5	0	0	0	2	0	0	0
	1737	0	0	4	3	5	0	0	0	2	0	0	0
	1738	0	0	4	3	4	0	0	0	2	0	0	0
	1739	0	0	4	3	4	0	0	0	2	0	0	0
	1740	0	0	4	3	4	0	0	0	2	0	0	0
	1741	0	0	4	3	3	0	0	0	2	0	0	0
	1742	0	0	4	3	1	0	0	0	4	0	0	0
	1743	0	0	3	3	1	0	0	0	4	0	0	0
	1744	0	0	3	3	0	0	0	0	4	0	0	0
	1745	0	0	3	3	0	0	0	0	4	0	0	0
	1746	0	0	3	3	0	0	0	0	4	0	0	0
	1747	0	0	3	4	0	0	0	0	4	0	0	0
	1748	0	0	3	4	0	0	0	0	4	0	0	0
	1749	2	0	3	4	0	0	0	0	4	0	0	0
	1750	2	0	3	4	0	0	0	0	4	0	0	0
	1751	2	0	3	4	0	0	0	0	4	0	0	0
	1752	2	0	3	4	0	0	0	0	5	0	0	0
	1753	2	0	3	4	0	0	0	0	4	0	0	0
	1754	2	0	3	4	0	0	0	0	4	0	0	0
	1755	2	0	2	4	0	0	0	0	4	0	0	0
	1756	2	0	2	3	0	0	0	0	4	0	0	0
	1757	2	0	1	3	0	0	0	0	1	0	0	0
	1758	2	0	1	3	0	0	0	0	1	0	0	0
	1759	2	0	1	3	0	0	0	0	1	0	0	0
	1760	2	0	1	3	1	0	0	0	1	0	0	0
	1761	2	0	1	3	1	0	0	0	1	0	0	0
	1762	2	0	1	3	1	0	0	0	1	0	0	0
	1763	2	0	1	3	1	0	0	0	1	0	0	0
	1764	2	0	1	3	1	0	0	0	1	0	0	0
	1765	2	0	1	3	1	0	0	0	1	0	0	0
	1766	2	0	1	3	1	0	0	0	2	0	0	0
	1767	2	0	1	3	1	0	0	0	2	0	0	0
	1768	2	1	1	2	1	0	0	0	2	0	0	0
	1769	2	1	1	2	1	0	0	0	2	0	0	0
	1770	3	1	1	2	1	0	0	0	2	0	0	0
	1771	3	1	1	2	1	0	0	0	2	0	0	0
	1772	3	1	1	2	1	0	0	0	2	0	0	0
	1773	3	1	1	2	1	0	0	0	3	0	0	0
	1774	3	1	1	1	1	0	0	0	3	0	0	0
	1775	3	1	1	1	0	0	0	0	3	0	0	0
	1776	3	1	1	1	0	0	0	0	6	0	0	0
	1777	3	1	1	1	0	0	0	0	6	0	0	0
	1778	3	1	1	1	0	0	0	0	6	0	0	0
	1779	3	1	1	1	1	0	0	0	6	0	0	0
	1780	3	2	1	1	1	0	0	0	6	0	0	0
	1781	3	2	1	1	1	0	0	0	6	0	0	0
	1782	3	2	1	1	1	0	0	0	6	0	0	0
	1783	4	2	0	1	2	0	0	0	6	0	0	0
	1784	4	2	0	1	2	0	0	0	6	0	0	0
	1785	4	2	0	1	3	0	0	0	6	0	0	0
	1786	4	2	0	1	3	0	0	0	6	0	0	0
	1787	4	2	0	1	3	0	0	0	6	0	0	0
	1788	4	3	0	1	3	0	0	0	6	0	0	0
	1789	4	3	0	1	3	0	0	0	6	0	0	0
	1790	4	3	0	1	3	0	0	0	6	0	0	0
	1791	4	3	0	1	3	0	0	0	6	0	0	0
	1792	2	3	0	1	3	0	0	0	6	0	0	0
	1793	2	3	0	1	3	0	0	0	2	0	0	0
	1794	1	3	0	1	3	0	0	0	2	0	0	0
	1795	1	3	0	1	3	0	0	0	2	0	0	0
	1796	1	3	0	1	3	0	0	0	2	0	0	0
	1797	1	3	0	0	3	0	0	1	1	0	0	0
	1798	1	3	0	0	2	0	0	1	1	0	0	0
	1799	1	3	0	0	2	0	0	1	1	0	0	0
	1800	1	3	0	0	2	0	0	1	1	0	0	0
	1801	1	3	0	0	2	0	0	1	1	0	0	0
	1802	0	2	0	0	2	0	0	1	1	0	0	0
	1803	0	1	0	0	2	0	0	1	1	0	0	0
	1804	0	1	0	0	2	0	0	1	1	0	0	0
	1805	0	1	0	0	1	0	0	1	1	0	0	0
	1806	0	1	0	0	1	0	0	1	1	0	0	0
	1807	0	1	0	0	1	0	0	1	1	0	0	0
	1808	0	1	0	0	1	0	0	1	1	0	0	0
	1809	0	1	0	0	1	0	0	1	1	0	0	0
	1810	0	1	0	0	1	0	0	1	1	0	0	0
	1811	0	1	0	0	1	0	0	1	1	0	0	0
	1812	0	0	0	0	1	0	0	1	1	0	0	0
	1813	0	0	0	0	1	0	0	1	2	0	0	0
	1814	0	0	0	0	1	0	0	1	2	0	0	0
	1815	0	0	0	0	0	0	0	1	2	0	0	0
	1816	0	0	0	0	0	0	0	1	2	0	0	0
	1817	1	0	0	0	0	0	0	1	2	0	0	0
	1818	1	0	0	0	0	0	0	0	2	0	0	0
	1819	1	0	0	0	0	0	0	0	2	0	0	0
	1820	1	0	0	0	0	0	0	0	4	0	0	0
	1821	1	0	0	0	0	0	0	0	5	0	0	0
	1822	1	0	0	0	0	0	0	0	5	0	0	0
	1823	1	0	0	0	0	0	0	0	5	0	0	0
	1824	1	0	0	0	0	0	0	0	5	0	0	0
	1825	1	0	0	0	1	0	0	0	6	0	0	0
	1826	1	0	0	0	1	0	0	0	6	0	0	0
	1827	1	0	0	0	1	0	0	0	6	0	0	0
	1828	1	0	0	0	1	0	0	0	6	0	0	0
	1829	1	0	0	0	1	0	0	0	8	0	0	0
	1830	1	0	0	0	1	0	0	0	8	0	0	0
	1831	1	0	0	0	1	0	0	0	8	0	0	0
	1832	1	0	0	0	1	0	0	0	8	0	0	0
	1833	1	0	0	0	1	0	0	0	9	0	0	0
	1834	1	0	0	0	1	0	0	0	9	0	0	0
	1835	1	0	0	0	1	0	0	0	9	0	0	0
	1836	1	0	0	0	1	0	0	0	8	0	0	0
	1837	1	0	0	0	1	0	0	0	7	0	0	0
	1838	1	0	0	0	1	0	0	0	7	0	0	0
	1839	1	0	0	0	1	0	0	0	6	0	0	0
	1840	1	0	0	0	1	0	0	0	6	0	0	0
	1841	1	0	0	0	1	0	0	0	5	0	0	0
	1842	1	0	0	0	0	0	0	0	5	0	0	0
	1843	1	0	0	0	0	0	0	0	4	0	0	0
	1844	0	0	0	0	0	0	0	0	4	0	0	0
	1845	0	0	0	0	0	0	0	0	4	0	0	0
	1846	0	0	0	0	0	0	0	0	4	0	0	0
	1847	0	0	0	0	0	0	0	0	4	0	0	0
	1848	0	0	0	0	0	0	0	0	4	0	0	0
	1849	0	0	0	0	0	0	0	0	2	0	0	0
	1850	0	0	0	0	0	0	0	0	2	0	0	0
	1851	0	0	0	0	0	0	0	0	2	0	0	0
	1852	0	0	0	0	0	0	0	0	2	0	0	0
	1853	0	0	0	0	0	0	0	0	2	0	0	0
	1854	0	0	0	0	0	0	0	0	2	0	0	0
	1855	0	0	0	0	0	0	0	0	0	0	0	0
	1856	0	0	0	0	0	0	0	0	0	0	0	0
	1857	0	0	0	0	0	0	0	0	0	0	0	0
	1858	0	0	0	0	0	0	0	0	0	0	0	0
	1859	0	0	0	0	0	0	0	0	0	0	0	0
	1860	0	0	0	0	0	0	0	0	0	0	0	0
	1861	0	0	0	0	0	0	0	0	0	0	0	0
	1862	0	0	0	0	0	0	0	0	0	0	0	0
	1863	0	0	0	0	0	0	0	0	0	0	0	0
	1864	0	0	0	0	0	0	0	0	0	0	0	0
	1865	0	0	0	0	0	0	0	0	0	0	0	0
	1866	0	0	0	0	0	0	0	0	0	0	0	0
	1867	0	0	0	0	0	0	0	0	0	0	0	0
	1868	0	0	0	0	0	0	0	0	0	0	0	0
	1869	0	0	0	0	0	0	0	0	0	0	0	0
	1870	0	0	0	0	0	0	0	0	0	0	0	0
	1871	0	0	0	0	0	0	0	0	0	0	0	0
	1872	0	0	0	0	0	0	0	0	0	0	0	0
	1873	0	0	0	0	0	0	0	0	0	0	0	0
	1874	0	0	0	0	0	0	0	0	0	0	0	0
	1875	0	0	0	0	0	0	0	0	0	0	0	0
	1876	0	0	0	0	0	0	0	0	0	0	0	0
	1877	0	0	0	0	0	0	0	0	0	0	0	0
	1878	0	0	0	0	0	0	0	0	0	0	0	0
	1879	0	0	0	0	0	0	0	0	0	0	0	0
	1880	0	2	0	0	0	0	0	0	0	0	0	0
	1881	0	2	0	0	0	0	0	0	0	0	0	0
	1882	0	2	0	0	0	0	0	0	0	0	0	0
	1883	0	2	0	0	0	0	0	0	0	0	0	0
	1884	0	2	0	0	0	0	0	0	0	0	0	0
	1885	0	2	0	0	0	0	0	0	0	0	0	0
	1886	0	2	0	0	0	0	0	0	0	0	0	0
	1887	0	2	0	0	0	0	0	0	0	0	0	0
	1888	0	2	0	0	0	0	0	0	0	0	0	0
	1889	0	2	0	0	0	0	0	0	0	0	0	0
	1890	0	2	0	0	0	0	0	0	0	0	0	0
	1891	0	2	0	0	0	0	0	0	0	0	0	0
	1892	0	2	0	0	0	0	0	0	1	0	0	0
	1893	0	2	0	0	0	0	0	0	1	0	0	0
	1894	0	2	0	0	2	0	0	0	1	0	0	0
	1895	0	2	0	0	2	0	0	0	1	0	0	0
	1896	0	2	0	0	2	0	0	0	1	0	0	0
	1897	0	2	0	0	2	0	0	0	1	0	0	0
	1898	0	2	0	0	2	0	0	0	1	0	0	0
	1899	0	2	0	0	2	0	0	0	1	0	0	0
	1900	0	2	0	0	2	0	0	0	1	0	0	0
	1901	0	2	0	0	2	0	0	0	1	0	0	0
	1902	0	2	0	0	2	0	0	0	1	0	0	0
	1903	0	1	0	0	2	0	0	0	1	0	0	0
	1904	0	0	0	0	2	0	0	0	1	0	0	0
	1905	0	0	0	0	2	0	0	0	1	0	0	0
	1906	0	0	0	0	2	0	0	0	1	0	0	0
	1907	0	0	0	0	2	0	0	0	1	0	0	0
	1908	0	0	0	0	2	0	0	0	1	0	0	0
	1909	0	0	0	0	2	0	0	0	1	0	0	0
	1910	0	0	0	0	2	0	0	0	1	0	0	0
	1911	0	0	0	0	2	0	0	0	1	0	0	0
	1912	0	0	0	0	2	0	0	0	2	0	0	0
	1913	0	0	0	0	2	0	0	0	2	0	0	0
	1914	0	0	0	0	2	0	0	0	2	0	0	0
	1915	0	0	0	0	2	0	0	0	2	0	0	0
	1916	0	0	0	0	2	0	0	0	2	0	0	0
	1917	0	0	0	0	2	0	0	0	2	0	0	0
	1918	0	0	0	0	2	0	0	0	1	0	0	0
	1919	0	0	0	0	0	0	0	0	1	0	0	0
	1920	0	0	0	0	0	0	0	0	1	0	0	0
	1921	0	0	0	0	0	0	0	0	1	0	0	0
	1922	0	0	0	0	0	0	0	0	1	0	0	0
	1923	0	0	0	0	0	0	0	0	1	0	0	0
	1924	0	0	0	0	0	0	0	0	1	0	0	0
	1925	0	0	0	0	0	0	0	0	1	0	0	0
	1926	0	0	0	0	0	0	0	0	1	0	0	0
	1927	0	0	0	0	0	0	0	0	1	0	0	0
	1928	0	0	0	0	0	0	0	0	1	0	0	0
	1929	0	0	0	0	0	0	0	0	1	0	0	0
	1930	0	0	0	0	0	0	0	0	1	0	0	0
	1931	0	0	0	0	0	0	0	0	1	0	0	0
	1932	0	0	0	0	0	0	0	0	1	0	0	0
	1933	0	0	0	0	0	0	0	0	1	0	0	0
	1934	0	0	6	0	0	0	0	0	1	0	0	0
	1935	0	0	6	0	0	0	0	0	1	0	0	0
	1936	0	0	6	0	0	0	0	0	2	0	0	0
	1937	0	0	6	0	0	0	0	0	2	0	0	0
	1938	0	0	6	0	0	0	0	0	2	0	0	0
	1939	0	0	6	0	0	0	0	0	2	0	0	0
	1940	0	0	6	0	3	0	0	0	2	0	0	0
	1941	0	0	6	0	3	0	0	0	2	0	0	0
	1942	0	0	6	0	3	0	0	0	2	0	0	0
	1943	0	0	6	0	3	0	0	0	2	0	0	0
	1944	0	0	6	0	3	0	0	0	1	0	0	0
	1945	1	0	6	0	3	0	0	0	2	0	0	0
	1946	1	0	6	0	3	0	0	0	2	0	0	0
	1947	1	0	6	0	3	0	0	0	2	0	0	0
	1948	1	0	6	0	3	0	0	0	2	0	0	0
	1949	1	0	6	0	3	0	0	0	2	0	0	0
	1950	1	0	6	0	3	0	0	0	2	0	0	0
	1951	1	0	2	0	3	0	0	0	2	0	0	0
	1952	1	0	0	0	3	0	0	0	2	0	0	0
	1953	1	0	0	0	3	0	0	0	2	0	0	0
	1954	1	0	0	0	3	0	0	0	2	0	0	0
	1955	1	0	0	0	3	0	0	0	2	0	0	0
	1956	1	0	0	0	3	0	0	0	3	0	0	0
	1957	1	0	0	0	3	0	0	0	3	0	0	0
	1958	1	0	0	0	0	0	0	0	3	0	0	0
	1959	1	0	0	0	0	0	0	0	5	0	0	0
	1960	1	0	0	0	0	0	0	0	5	0	0	0
	1961	1	0	0	0	0	0	0	0	5	0	0	0
	1962	1	0	0	0	1	0	0	0	5	0	0	0
	1963	1	0	0	0	1	0	0	0	5	0	0	0
	1964	1	0	0	0	1	0	0	0	5	0	0	0
	1965	1	0	0	0	1	0	0	0	5	0	0	0
	1966	1	0	0	0	1	0	0	0	5	0	0	0
	1967	1	0	0	0	1	0	0	0	5	0	0	0
	1968	1	0	0	0	1	0	0	0	5	0	0	0
	1969	1	0	0	0	2	0	0	0	5	0	0	0
	1970	0	0	0	0	2	0	0	0	4	0	0	0
	1971	0	0	0	0	2	0	0	0	3	0	0	0
	1972	0	0	0	0	2	0	0	0	3	0	0	0
	1973	0	0	0	0	6	0	0	0	3	0	1	0
	1974	0	0	0	0	6	0	0	0	4	0	1	0
	1975	0	0	0	0	6	0	0	0	4	0	1	0
	1976	0	0	0	0	6	0	0	0	4	0	1	0
	1977	0	0	0	0	6	0	0	0	5	0	1	0
	1978	0	0	2	0	6	0	0	0	6	0	1	0
	1979	0	0	2	0	6	0	0	0	6	0	1	0
	1980	0	0	2	0	6	0	0	0	6	0	1	0
	1981	0	0	2	0	6	0	0	0	6	0	1	0
	1982	0	0	2	0	6	0	0	0	6	0	1	0
	1983	0	0	2	0	6	0	0	0	6	0	1	0
	1984	0	0	2	0	7	0	0	0	6	0	1	0
	1985	0	0	2	0	6	0	0	0	6	0	1	0
	1986	0	0	2	0	6	0	0	0	6	0	1	0
	1987	0	0	2	0	5	0	0	0	4	0	1	0
	1988	0	0	2	0	5	0	0	0	4	0	1	0
	1989	0	0	2	0	5	0	0	0	4	0	1	0
	1990	0	0	2	0	1	0	0	0	4	0	1	0
	1991	0	0	2	0	1	0	0	0	3	0	1	0
	1992	0	0	2	0	1	0	0	0	3	0	1	0
	1993	0	0	2	0	1	0	0	0	2	0	1	0
	1994	0	0	0	0	1	0	0	0	2	0	1	0
	1995	0	0	0	0	1	0	0	0	2	0	1	0
	1996	0	0	0	0	1	0	0	0	2	0	0	0
	1997	0	0	0	0	1	0	0	0	2	0	0	0
[truncated: 3,390 more rows]
