# Supplementary material for: A Comprehensive Analysis of Replicating Merkel Cell Polyomavirus Genomes Delineates the Viral Transcription Program and Suggests a Role for mcv-miR-M1 in Episomal Persistence
Source: PLoS Pathog. 2015 Jul 28;11(7):e1004974. doi: 10.1371/journal.ppat.1004974 (PMC4517807; doi:10.1371/journal.ppat.1004974)
Supplement: S3 Dataset — Distribution of mature miRNA reads exhibiting the indicated seed sequences (left columns), arranged according to their relative position in the mcv-miR-M1 stem loop precursor encoded by nucleotides 1251 to 1168 of the MCVSyn genome. Read counts are given for each seed as observed in PFSK-1:MCVSyn, WaGa or MKL-1 when using NEBNext or Truseq library preparation protocols. (XLSX) [file ppat.1004974.s013.xlsx]

## Sheet: Dataset_S3
	mature miRNA seed			PFSK-1:MCVSyn		WaGa		MKL-1
	start	end	sequence	NEBNext	TruSeq	NEBNext	TruSeq	NEBNext	TruSeq
	2	8	GGUGCCA	0	0	0	0	0	0
	3	9	GUGCCAU	0	0	0	0	0	0
	4	10	UGCCAUC	2	0	0	0	0	0
	5	11	GCCAUCC	0	0	0	0	0	0
	6	12	CCAUCCG	0	0	0	0	0	0
	7	13	CAUCCGU	1	0	0	0	0	0
	8	14	AUCCGUU	1	0	0	0	0	0
	9	15	UCCGUUC	0	0	0	0	0	0
	10	16	CCGUUCU	0	0	0	0	0	0
	11	17	CGUUCUG	1	0	0	0	0	0
	12	18	GUUCUGG	0	0	0	0	0	0
	13	19	UUCUGGA	2	4	0	0	0	0
	14	20	UCUGGAA	5	6	0	0	0	0
	15	21	CUGGAAG	21443	27328	8	74	9	121
	16	22	UGGAAGA	112	184	0	2	0	1
	17	23	GGAAGAA	366838	906	51	6	78	7
	18	24	GAAGAAU	376	0	0	0	0	0
	19	25	AAGAAUU	10	1999	0	0	0	0
	20	26	AGAAUUU	16	24	0	0	0	0
	21	27	GAAUUUC	2	73	0	0	0	0
	22	28	AAUUUCU	2	0	0	0	0	0
	23	29	AUUUCUA	9	11	0	0	0	0
	24	30	UUUCUAG	5	18	0	0	0	0
	25	31	UUCUAGG	0	0	0	0	0	0
	26	32	UCUAGGU	0	0	0	0	0	0
	27	33	CUAGGUA	0	0	0	0	0	0
	28	34	UAGGUAC	0	0	0	0	0	0
	29	35	AGGUACA	2	0	0	0	0	0
	30	36	GGUACAC	0	0	0	0	0	0
	31	37	GUACACU	0	0	0	0	0	0
	32	38	UACACUG	0	0	0	0	0	0
	33	39	ACACUGG	0	0	0	0	0	0
	34	40	CACUGGU	0	0	0	0	0	0
	35	41	ACUGGUU	0	0	0	0	0	0
	36	42	CUGGUUC	1	0	0	0	0	0
	37	43	UGGUUCC	0	0	0	0	0	0
	38	44	GGUUCCA	0	0	0	0	0	0
	39	45	GUUCCAU	0	0	0	0	0	0
	40	46	UUCCAUU	0	0	0	0	0	0
	41	47	UCCAUUG	2	0	0	0	0	0
	42	48	CCAUUGG	0	0	0	0	0	0
	43	49	CAUUGGG	0	0	0	0	0	0
	44	50	AUUGGGU	0	0	0	0	0	0
	45	51	UUGGGUG	4	8	0	0	0	0
	46	52	UGGGUGU	0	0	0	0	0	0
	47	53	GGGUGUG	4	0	0	0	0	0
	48	54	GGUGUGC	6	0	0	0	0	0
	49	55	GUGUGCU	1	1	0	0	0	0
	50	56	UGUGCUG	325	17	0	0	0	0
	51	57	GUGCUGG	34753	4672	18	11	11	10
	52	58	UGCUGGA	138756	2952	72	6	88	13
	53	59	GCUGGAU	2044	32	1	0	1	0
	54	60	CUGGAUU	24	5	0	0	0	0
	55	61	UGGAUUC	7	376	0	0	0	0
	56	62	GGAUUCU	10	260	0	0	0	0
	57	63	GAUUCUC	1	0	0	0	0	0
	58	64	AUUCUCU	0	0	0	0	0	0
	59	65	UUCUCUU	0	0	0	0	0	0
	60	66	UCUCUUC	0	0	0	0	0	0
	61	67	CUCUUCC	0	0	0	0	0	0
	62	68	UCUUCCU	0	0	0	0	0	0
	63	69	CUUCCUG	0	0	0	0	0	0
	64	70	UUCCUGA	0	0	0	0	0	0
	65	71	UCCUGAA	8	0	0	0	0	0
	66	72	CCUGAAU	0	0	0	0	0	0
	67	73	CUGAAUU	0	0	0	0	0	0
	68	74	UGAAUUG	0	0	0	0	0	0
	69	75	GAAUUGG	0	0	0	0	0	0
	70	76	AAUUGGU	1	0	0	0	0	0
	71	77	AUUGGUG	0	0	0	0	0	0
	72	78	UUGGUGG	0	0	0	0	0	0
	73	79	UGGUGGU	0	0	0	0	0	0
	74	80	GGUGGUC	0	0	0	0	0	0
	75	81	GUGGUCU	0	0	0	0	0	0
	76	82	UGGUCUC	0	0	0	0	0	0
	77	83	GGUCUCC	0	0	0	0	0	0
	78	84	GUCUCCU	0	0	0	0	0	0
